# Supplementary material for: Traditional plant use in Burkina Faso (West Africa): a national-scale analysis with focus on traditional medicine
Source: PubMed Central journal article supplement (PMC4429461; doi:10.1186/1746-4269-11-9), 2015-02-19

# Histogram of the number of medicinal applications per species

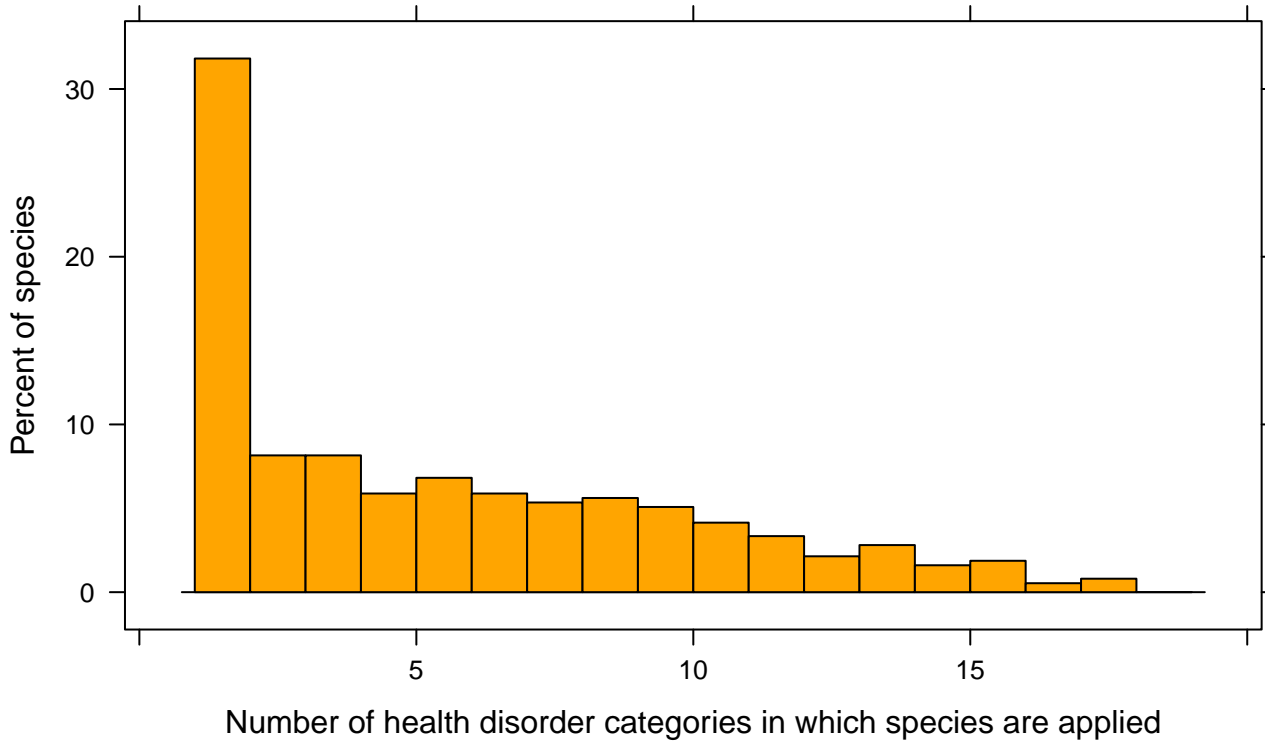

Supplement: 13002_2014_473_MOESM6_ESM.pdf [file 13002_2014_473_MOESM6_ESM.pdf]
