# Supplementary material for: Traditional plant use in Burkina Faso (West Africa): a national-scale analysis with focus on traditional medicine
Source: J Ethnobiol Ethnomed. 2015 Feb 19;11:9. doi: 10.1186/1746-4269-11-9 (PMC4429461; doi:10.1186/1746-4269-11-9)
Supplement: Supplementary file 2 — Additional file 2: List of vernacular names in Mòoré and scientific names of the most common plants. (XLSX 23 KB) [file 13002_2014_473_MOESM2_ESM.xlsx]

## Sheet: Sheet1
Accepted Name	Names in Mòoré
Abelmoschus esculentus	Maandé
Abrus precatorius	Noraogo nini
Abutilon grandifolium	Wobog-bèringa
Abutilon pannosum	Wobog-bèrin-daaga
Acacia ataxacantha	Gôaaga
Acacia dudgeonii	Gonpayandga
Acacia erythrocalyx	Kâguinga
Acacia erythrocalyx	Kâon-sabelga
Acacia gourmaensis	Gon sabelga
Acacia macrostachya	Zâmanega
Acacia nilotica	Pèg-nenga
Acacia nilotica	Pèguen-daaga
Acacia polyacantha	Kâon pèelega
Acacia senegal	Gon pèelega
Acacia seyal	Gon-ponsego
Acanthospermum hispidum	Guièma tâabo
Acanthospermum hispidum	Nasar-kurkur goâga
Achyranthes aspera	Baag-yewi
Achyranthes aspera	Baag-yooré
Adansonia digitata	Tohéga
Afzelia africana	Kankalga
Agave sisalana	Nasar-kâantoabga
Agave sisalana	Sisal
Albizia chevalieri	Tinguin dooâaga
Albizia lebbeck	Albizia
Allium cepa	Gambdo
Allium sativum	Laî
Aloe buettneri	Mintipa
Aloe buettneri	Napug-maandé
Alternanthera nodiflora	Tebeg pôonré
Alternanthera pungens	Rakonp-noedré
Alysicarpus glumaceus	Rab-gnâaga
Alysicarpus glumaceus	Rabgo
Alysicarpus ovalifolius	Rabgo
Alysicarpus ovalifolius	Rab-raaga
Amaranthus graecizans	Zimin-daaga
Amaranthus hybridus	Borom-borom
Amaranthus hybridus	Zimini
Amaranthus spinosus	Kurkur goâga
Amaranthus viridis	Zimin-gnâaga
Amaranthus viridis	Zimini
Amorphophallus baumannii	Fadé
Ampelocissus africana	Bugsin-tungu
Ananas comosus	Anana
Andropogon canaliculatus	Yandem
Andropogon gayanus	Monpoko
Andropogon gayanus	Pita
Annona senegalensis	Barkudga
Anogeissus leiocarpa	Siiga
Arachis hypogaea	Nanguri
Asparagus flagellaris	Baguem-baguem
Azadirachta indica	Niim
Baissea multiflora	Nongsego
Baissea multiflora	Nonguem taaba
Balanites aegyptiaca	Kyegelga
Bambusa vulgaris	Nasar-tanwiiga
Bauhinia rufescens	Tipohèga
Bergia suffruticosa	Kwirib-kwiribé
Bidens engleri	Kinkiris-sâbtulga
Bidens pilosa	Kinkiris-sâbtul-raaga
Biophytum umbraculum	Napagab-gôdeb-nao
Blepharis linariifolia	Yiemb-sandé
Blepharis linariifolia	Yiemb-yaoya
Blighia sapida	Finzan
Boerhavia diffusa	Katerwèka
Boerhavia erecta	Katerwèka-raaga
Boerhavia repens	Katerwèka
Bombax costatum	Voaka
Borassus aethiopum	Koan-bédré
Boscia senegalensis	Lambwetga
Boscia senegalensis	Nabré
Boswellia dalzielii	Gondregneogo
Boswellia dalzielii	Kondregneogo
Bougainvillea glabra	Bougainvillé
Bridelia ferruginea	Ambriaka
Burkea africana	Kasi-sané
Cadaba farinosa	Kiensga
Calotropis procera	Puterpuuga
Canavalia ensiformis	Peraog-nifri
Capparis sepiaria	Sil-koré
Capsicum annuum	Nasar-kiparé
Capsicum frutescens	Kiparé
Caralluma adscendens	Tub-taga
Carica papaya	Bog-firé
Carica papaya	Ma-taam
Cassia alata	Jonis-tiiga
Cassia italica	Kaneda
Cassia italica	Kaned-ma-tiiga
Cassia nigricans	Zander-kuka
Cassia obtusifolia	Katr-nanguri
Cassia obtusifolia	Sugda
Cassia occidentalis	Kinkéliba
Cassia sieberiana	Kumbr-saka
Cassia singueana	Gyel-poonsré
Cassytha filiformis	Naam-kabul
Casuarina equisetifolia	Filao
Cayratia gracilis	Lummesgo
Ceiba pentandra	Gunga
Celosia trigyna	Zug-bé-ligdi
Celtis toka	Pargandé
Celtis toka	Silsaka
Cenchrus biflorus	Râan'na
Ceratotheca sesamoides	Bundu
Chamaecrista pratensis	Tinguin-doaaga
Chrozophora brocchiana	Napug-siiga
Chrozophora senegalensis	Bund-yaaba
Chrysanthellum indicum	Sileg-nagneesse
Chrysanthellum indicum	Wantugdo
Chrysopogon nigritanus	Roudouma
Cienfuegosia digitata	Salguendo
Cissus populnea	Wob-gnâado
Cissus quadrangularis	Wob-zanre
Citrullus colocynthis	Niri
Cleome gynandra	Kiennebdo
Cleome viscosa	Kiennbdo-raaga
Cochlospermum planchonii	Sons-raaga
Cochlospermum tinctorium	Sôasga
Coldenia procumbens	Kwil-pusa
Combretum aculeatum	Kodin-tâabre
Combretum adenogonium	Kwiguin daaga
Combretum glutinosum	Kogn'ga
Combretum glutinosum	Kutr-wagle
Combretum micranthum	Randga
Combretum nigricans	Kouyi-miiga
Combretum paniculatum	Kudgu-lungu
Combretum sericeum	Barika-wili
Commelina benghalensis	Fulun-futu
Commelina diffusa	Fulfuudu
Commelina forskaolii	Fulfuudu
Commiphora africana	Saag-noabga
Corchorus olitorius	Bulvaka
Corchorus tridens	Bulvag-raaga
Crateva adansonii	Kalguem-tohèga
Crescentia cujete	Wamd-tiiga
Crinum distichum	Pôonsé
Crossopteryx febrifuga	Kumbr-wâaga
Crotalaria barkae	Liguid-yendé
Crotalaria naragutensis	Wen-lébendé
Crotalaria retusa	Songon-song-né
Cucurbita pepo	Yogré
Curculigo pilosa	Kodin-ki
Cyathula prostrata	Yongr-zuuré
Cymbopogon caesius	Kuwaré
Cyperus articulatus	Wusdu
Cyperus esculentus	Kiôgo
Cyperus reduncus	Ka-pin-ba
Dactyloctenium aegyptium	Goandba
Dalbergia melanoxylon	Guirdiandega
Dalbergia melanoxylon	Kak-ma
Daniellia oliveri	Aoga
Datura inoxia	Bayoarga
Detarium microcarpum	Kagadega
Dichrostachys cinerea	Susutga
Dicliptera paniculata	Pug-saben-daaga
Dicliptera verticillata	Pug-sabelga
Dicoma tomentosa	Gomtidga
Dicoma tomentosa	Sakwipêelega
Digitaria exilis	Fonio
Digitaria exilis	Kiou
Dioscorea alata	Ku
Dioscorea bulbifera	Ku
Dioscorea bulbifera	Ku
Dioscorea praehensilis	Boalag-gnui
Dioscorea praehensilis	Nagnui
Diospyros mespiliformis	Gâaka
Dyschoriste nagchana	Parparé
Echinochloa pyramidalis	Kul-moogo
Eclipta prostrata	Muso-fiin
Eleusine indica	Targanga
Elionurus elegans	Koons moogo
Elionurus elegans	Moo-saala
Entada africana	Sêonego
Eragrostis tremula	Saaga
Erythrina senegalensis	Kulin-tiiga
Eucalyptus camaldulensis	Ti-woaka
Euphorbia balsamifera	Wal-biisum
Euphorbia hirta	Bouu-biisum
Euphorbia hirta	Wal-biisum
Euphorbia prostrata	Nasar-banda-ku
Euphorbia pulcherrima	Taksindo
Evolvulus alsinoides	Soom-bundu
Excoecaria grahamii	Kionnem
Fadogia agrestis	Bit-koon-bré
Faidherbia albida	Zâanga
Feretia apodanthera	Fininga
Feretia apodanthera	Kitinga
Ficus carica	Nasar-kankanga
Ficus glumosa	Kan-kan sènega
Ficus ingens	Kunkwiiga
Ficus platyphylla	Kamsaogo
Ficus sur	Wom-sèèga
Ficus sycomorus	Kankanga
Ficus thonningii	Kûusga
Flueggea virosa	Sugdin-daaga
Gardenia erubescens	Subudga
Gardenia sokotensis	Tang-rakweenga
Gardenia ternifolia	Lambr-zuuga
Gardenia ternifolia	Subud-raaga
Glossonema boveanum	Kutin-lèenga
Gomphrena celosioides	Kâon-bîn-peendo
Gossypium barbadense	Lamdo
Gossypium herbaceum	Lamdo
Gossypium hirsutum	Lamdo
Grewia bicolor	Yoalga
Grewia mollis	Munumuka
Guiera senegalensis	Wilin-wiiga
Gymnosporia senegalensis	Tok-vugri
Heliotropium indicum	Gomtiug-zuré
Hibiscus cannabinus	Beringa
Hibiscus cannabinus	Rakon-bidgo
Hibiscus sabdariffa	Biito
Hibiscus sabdariffa	Wegdo
Holarrhena floribunda	Kinkiris-yoabga
Hoslundia opposita	Sankoné
Hoslundia opposita	Wamb-kiparé
Hygrophila auriculata	Kièga
Hygrophila auriculata	Kwileg-ra-kièk-ma
Hyphaene thebaica	Koomb-bila
Hyptis spicigera	Rung-rungui
Hyptis suaveolens	Rung-rung gnaaga
Imperata cylindrica	Pulumdi
Indigofera leptoclada	Bug-van-gneneg-raaga
Indigofera macrocalyx	Tebeg-pôonre
Indigofera nigritana	Bugvan-gnènega
Indigofera tinctoria	Garga
Ipomoea aquatica	Kwilguin-bèguedo
Ipomoea asarifolia	Kogol-koom
Ipomoea batatas	Nagnui-noodo
Ipomoea eriocarpa	Bulli-bîisum
Isoberlinia doka	Kalsaka
Jatropha curcas	Wan-bin-bang-ma
Jatropha gossypiifolia	Wan-bin-banguem-daaga
Khaya senegalensis	Kuka
Kohautia tenuis	Yiam-sabsé
Lagenaria siceraria	Kâandé
Lagenaria siceraria	Wamdé
Lannea acida	Sabtulga
Lannea microcarpa	Sabga
Lannea velutina	Waam-sabga
Lantana camara	Nasar-liuli-sibi
Lantana ukambensis	Liuli-sibi
Lawsonia inermis	Lallé
Lepidagathis anobrya	Gnug-nakida
Leptadenia hastata	Lolongo
Leucas martinicensis	Bîin-wubdo
Lippia chevalieri	Guraogo
Lippia chevalieri	Wisao
Lippia multiflora	Kwileg-wisao
Loeseneriella africana	Zibri
Luffa cylindrica	Needego
Maerua angolensis	Zilogo
Maerua crassifolia	Kesgha
Mangifera indica	Mango-tiiga
Manihot esculenta	Bandaku
Merremia tridentata	Guinin-guid-raaga
Mimosa pigra	Kwil-kâongo
Mitragyna inermis	Yiilga
Mollugo nudicaulis	Tinguin-kiensga
Momordica balsamina	Mogod-ti-raaga
Momordica charantia	Mogod-tiim
Moringa oleifera	Arzan-tiiga
Musa x paradisiaca	Banandé
Nelsonia canescens	Tinguin-pusga
Nicotiana rustica	Kikiristabré
Nicotiana rustica	Waam-tabré
Nymphaea lotus	Gwiila
Ochna schweinfurthiana	Ti-kweenga
Ocimum americanum	Yulin-gnu-raaga
Ocimum basilicum	Yulin-gnuuga
Oldenlandia corymbosa	Yaam-sâbega
Opilia amentacea	Wag-salega
Oryza sativa	Moui
Oxytenanthera abyssinica	Tan-wiiga
Ozoroa obovata	Nin-nooré
Pandiaka angustifolia	Yod-sabelé
Parkia biglobosa	Roâanga
Parkinsonia aculeata	Nasar-arzan-tiiga
Paullinia pinnata	Nus-a-nu
Pavetta crassipes	Mok-biisri
Pennisetum glaucum	Kazui
Pennisetum pedicellatum	Kimbogo
Pennisetum polystachion	Kimbogo
Pericopsis laxiflora	Kwil taanga
Phaseolus vulgaris	Nasar-benga
Phoenix dactylifera	Mac-kiègla
Phragmites australis	Kâaga
Physalis angulata	Lizoré
Physalis angulata	Nokâbsé raaga
Physalis angulata	Poapoa raaga
Physalis lagascae	Lizoré
Physalis lagascae	Nokâbsé raaga
Physalis lagascae	Poapoa raaga
Piliostigma reticulatum	Bâguendé
Piliostigma thonningii	Bâguin-râaga
Pistia stratiotes	Kater-guîila
Plumbago zeylanica	Tantaber-boèèga
Polycarpaea linearifolia	Wom-ligidi
Polygala arenaria	Tinguin voogré
Portulaca oleracea	Baag-zerma
Portulaca quadrifida	Teng-kwi-tem-kwi
Prosopis africana	Duanduanga
Prosopis africana	Gnuriseg
Prosopis africana	Seinga
Prosopis juliflora	Nasar-rôondo
Pseudocedrela kotschyi	Siguedré
Psidium guajava	Goyaaka
Pteleopsis suberosa	Guirga
Pterocarpus erinaceus	Noynga
Pterocarpus lucens	Pèm-perga
Pterocarpus lucens	Pèperga
Pterocarpus lucens	Pipirga
Pulicaria undulata	Gâog-bin-peendo
Pupalia lappacea	Yoens-tabendo
Ricinus communis	Gan-noanga
Saba senegalensis	Wedga
Saccharum officinarum	Nasar-kankan-sido
Sansevieria senegambica	Kaantoabga
Sarcocephalus latifolius	Gwîinga
Sarcostemma viminale	Wob-gnaado
Schoenefeldia gracilis	Saaga
Scleria sphaerocarpa	Baangue-saando
Sclerocarya birrea	Noabga
Scoparia dulcis	Kaafr-maandé
Securidaca longipedunculata	Pelga
Sesamum alatum	Kater-siili
Sesamum indicum	Siili
Sesbania leptocarpa	Kwilguin-dôaaga
Sesbania pachycarpa	Tab-ruk-raoogo
Setaria pumila	Kounsgo
Sida acuta	Zon-raaga
Sida alba	Zoâaga
Sida cordifolia	Zon-gnâaga
Solanum aethiopicum	Kumba
Solanum incanum	Noraog-kumbré
Solanum melongena	Nasar kumbré
Solanum nigrum	Luudo
Solenostemon rotundifolius	Fabirama
Solenostemon rotundifolius	Pèèsa
Sorghum bicolor	Kèènda
Spermacoce chaetocephala	Yod-miougou
Spermacoce chaetocephala	Yodré
Spermacoce stachydea	Yod-raaga
Spermacoce verticillata	Yod-pèelga
Spigelia anthelmia	Nag-zelma
Sporobolus festivus	Liuli saaga
Sporobolus pyramidalis	Gaan saaga
Stachytarpheta indica	Kièèga
Sterculia setigera	Ponsemporgo
Stereospermum kunthianum	Nin-yilenga
Stereospermum kunthianum	Vulga
Striga hermonthica	Woongo
Strophanthus sarmentosus	Yoalga
Strychnos spinosa	Katin-poâaga
Stylochaeton hypogaeus	Koadba
Stylochaeton hypogaeus	Vidba
Stylosanthes erecta	Sakwisabelga
Stylosanthes fruticosa	Pîidu
Tamarindus indica	Pusga
Tapinanthus bangwensis	Welebré
Tapinanthus globiferus	Welebré
Tapinanthus ophiodes	Welebré
Tecoma stans	Tecoma
Tephrosia bracteolata	Sanri
Tephrosia pedicellata	Sanri-raaga
Tephrosia purpurea	Wedguin-ma-gnenna
Terminalia avicennioides	Koondré
Terminalia macroptera	Koond-poko
Terminalia mantaly	Etage tiiga
Thalia geniculata	Boanga-rugi
Tinnea barteri	Kinkiris kaandé
Tinospora bakis	Besande
Tinospora bakis	Wob-sande
Trianthema portulacastrum	Warpag-benda
Tribulus terrestris	Sil-gningre
Trichilia emetica	Kinkiris taanga
Triumfetta rhomboidea	Na-tu-kuli
Vernonia colorata	Koa-safandé
Vernonia galamensis	Kikiris-siili
Vigna subterranea	Souma
Vigna unguiculata	Benga
Vitellaria paradoxa	Taanga
Vitex doniana	Âadega
Waltheria indica	Yar-yaamde
Wissadula rostrata	Goomtiug-laongo
Ximenia americana	Lèenga
Xylopia aethiopica	Kiparin sabelga
Zanthoxylum zanthoxyloides	Rapeoko
Zea mays	Kamaana
Ziziphus mauritiana	Mugunuga
Ziziphus mucronata	Mugun-toogo (Kiimes-mugunuga)
Zornia glochidiata	Na tuu kuli
