# Supplementary material for: Traditional plant use in Burkina Faso (West Africa): a national-scale analysis with focus on traditional medicine
Source: J Ethnobiol Ethnomed. 2015 Feb 19;11:9. doi: 10.1186/1746-4269-11-9 (PMC4429461; doi:10.1186/1746-4269-11-9)
Supplement: Supplementary file 4 — Additional file 4: Usefulness ranking of all species with at least one documented use. (XLSX 67 KB) [file 13002_2014_473_MOESM4_ESM.xlsx]

## Sheet: Sheet1
Accepted Name	Family	Number of Uses	Frequency of citation	Relative frequency of citation	Relative importance index																																										berhaut1975	berhaut1974	lebrun1991
Khaya senegalensis (Desr.) A.Juss.	Meliaceae	9	24	0.5	0.98
Adansonia digitata L.	Malvaceae	8	25	0.52	0.944
Diospyros mespiliformis Hochst. ex A.DC.	Ebenaceae	8	25	0.52	0.944
Vitellaria paradoxa C.F.Gaertn.	Sapotaceae	8	25	0.52	0.944
Balanites aegyptiaca (L.) Delile	Zygophyllaceae	8	24	0.5	0.924
Tamarindus indica L.	Fabaceae	8	24	0.5	0.924
Parkia biglobosa (Jacq.) R.Br. ex G.Don	Fabaceae	8	22	0.46	0.884
Mitragyna inermis (Willd.) Kuntze	Rubiaceae	8	21	0.44	0.864
Annona senegalensis Pers.	Annonaceae	8	20	0.42	0.844
Sclerocarya birrea (A.Rich.) Hochst.	Anacardiaceae	8	20	0.42	0.844
Pterocarpus erinaceus Poir.	Fabaceae	8	19	0.4	0.824
Anogeissus leiocarpa (DC.) Guill. & Perr.	Combretaceae	7	21	0.44	0.809
Guiera senegalensis J.F.Gmel.	Combretaceae	7	21	0.44	0.809
Lannea microcarpa Engl. & K.Krause	Anacardiaceae	7	21	0.44	0.809
Piliostigma reticulatum (DC.) Hochst.	Fabaceae	8	18	0.38	0.804
Detarium microcarpum Guill. & Perr.	Fabaceae	7	20	0.42	0.789
Combretum glutinosum Perr. ex DC.	Combretaceae	8	17	0.35	0.784
Ficus sycomorus L.	Moraceae	7	19	0.4	0.769
Sterculia setigera Delile	Malvaceae	7	19	0.4	0.769
Ximenia americana L.	Ximeniaceae	7	19	0.4	0.769
Sarcocephalus latifolius (Sm.) E.A.Bruce	Rubiaceae	8	16	0.33	0.764
Bombax costatum Pellegr. & Vuill.	Malvaceae	7	18	0.38	0.749
Bauhinia rufescens Lam.	Fabaceae	8	15	0.31	0.744
Combretum micranthum G.Don	Combretaceae	7	17	0.35	0.729
Faidherbia albida (Delile) A.Chev.	Fabaceae	7	17	0.35	0.729
Lannea acida A.Rich.	Anacardiaceae	7	17	0.35	0.729
Securidaca longipedunculata Fresen.	Polygalaceae	7	17	0.35	0.729
Prosopis africana (Guill. & Perr.) Taub.	Fabaceae	8	14	0.29	0.724
Terminalia avicennioides Guill. & Perr.	Combretaceae	8	14	0.29	0.724
Cassia sieberiana DC.	Fabaceae	6	19	0.4	0.713
Vitex doniana Sweet	Lamiaceae	6	19	0.4	0.713
Azadirachta indica A.Juss.	Meliaceae	8	13	0.27	0.704
Afzelia africana Sm. ex Pers.	Fabaceae	7	15	0.31	0.689
Gardenia erubescens Stapf & Hutch.	Rubiaceae	7	15	0.31	0.689
Crossopteryx febrifuga (Afzel. ex G.Don) Benth.	Rubiaceae	8	12	0.25	0.684
Acacia nilotica (L.) Willd. ex Delile	Fabaceae	6	17	0.35	0.673
Ceiba pentandra (L.) Gaertn.	Malvaceae	7	14	0.29	0.669
Gymnosporia senegalensis (Lam.) Loes.	Celastraceae	7	14	0.29	0.669
Acacia seyal Delile	Fabaceae	6	16	0.33	0.653
Pteleopsis suberosa Engl. & Diels	Combretaceae	7	13	0.27	0.649
Acacia macrostachya Rchb. ex DC.	Fabaceae	6	14	0.29	0.613
Entada africana Guill. & Perr.	Fabaceae	6	14	0.29	0.613
Feretia apodanthera Delile	Rubiaceae	6	14	0.29	0.613
Saba senegalensis (A.DC.) Pichon	Apocynaceae	6	14	0.29	0.613
Ziziphus mauritiana Lam.	Rhamnaceae	6	14	0.29	0.613
Calotropis procera (Aiton) R.Br.	Apocynaceae	6	13	0.27	0.593
Ficus platyphylla Delile	Moraceae	6	13	0.27	0.593
Burkea africana Hook.	Fabaceae	7	10	0.21	0.589
Gardenia ternifolia Schumach. & Thonn.	Rubiaceae	7	10	0.21	0.589
Crateva adansonii DC.	Capparaceae	8	7	0.15	0.584
Daniellia oliveri (Rolfe) Hutch. & Dalziel	Fabaceae	5	15	0.31	0.578
Pseudocedrela kotschyi (Schweinf.) Harms	Meliaceae	6	12	0.25	0.573
Piliostigma thonningii (Schumach.) Milne-Redh.	Fabaceae	5	14	0.29	0.558
Dichrostachys cinerea (L.) Wight & Arn.	Fabaceae	6	11	0.23	0.553
Grewia bicolor Juss.	Malvaceae	6	11	0.23	0.553
Lannea velutina A.Rich.	Anacardiaceae	6	11	0.23	0.553
Trichilia emetica Vahl	Meliaceae	6	11	0.23	0.553
Albizia chevalieri Harms	Fabaceae	7	8	0.17	0.549
Commiphora africana (A.Rich.) Engl.	Burseraceae	7	8	0.17	0.549
Ziziphus mucronata Willd.	Rhamnaceae	7	8	0.17	0.549
Strychnos spinosa Lam.	Loganiaceae	5	13	0.27	0.538
Acacia dudgeonii Craib ex Holland	Fabaceae	6	10	0.21	0.533
Combretum paniculatum Vent.	Combretaceae	6	10	0.21	0.533
Dalbergia melanoxylon Guill. & Perr.	Fabaceae	6	10	0.21	0.533
Eucalyptus camaldulensis Dehnh.	Myrtaceae	6	10	0.21	0.533
Ficus sur Forssk.	Moraceae	6	10	0.21	0.533
Acacia gourmaensis A.Chev.	Fabaceae	7	7	0.15	0.529
Acacia polyacantha Willd.	Fabaceae	7	7	0.15	0.529
Cissus populnea Guill. & Perr.	Vitaceae	7	7	0.15	0.529
Maerua crassifolia Forssk.	Capparaceae	6	9	0.19	0.513
Mangifera indica L.	Anacardiaceae	6	9	0.19	0.513
Terminalia macroptera Guill. & Perr.	Combretaceae	6	9	0.19	0.513
Ficus glumosa Delile	Moraceae	7	6	0.13	0.509
Terminalia laxiflora Engl. & Diels	Combretaceae	7	6	0.13	0.509
Oxytenanthera abyssinica (A.Rich.) Munro	Poaceae	8	3	0.06	0.504
Boscia senegalensis (Pers.) Lam.	Capparaceae	5	11	0.23	0.498
Cadaba farinosa Forssk.	Capparaceae	5	11	0.23	0.498
Boscia angustifolia A.Rich.	Capparaceae	6	8	0.17	0.493
Combretum nigricans Lepr. ex Guill. & Perr.	Combretaceae	6	8	0.17	0.493
Ficus thonningii Blume	Moraceae	6	8	0.17	0.493
Parinari curatellifolia Planch. ex Benth.	Chrysobalanaceae	6	8	0.17	0.493
Pericopsis laxiflora (Benth.) Meeuwen	Fabaceae	6	8	0.17	0.493
Pterocarpus lucens Lepr. ex Guill. & Perr.	Fabaceae	6	8	0.17	0.493
Stereospermum kunthianum Cham.	Bignoniaceae	6	8	0.17	0.493
Leptadenia hastata (Pers.) Decne.	Apocynaceae	4	13	0.27	0.482
Acacia sieberiana DC.	Fabaceae	5	10	0.21	0.478
Borassus aethiopum Mart.	Arecaceae	5	10	0.21	0.478
Moringa oleifera L.	Moringaceae	5	10	0.21	0.478
Acacia senegal (L.) Willd.	Fabaceae	6	7	0.15	0.473
Acacia tortilis (Forssk.) Hayne	Fabaceae	6	7	0.15	0.473
Gardenia aqualla Stapf & Hutch.	Rubiaceae	7	4	0.08	0.469
Grewia flavescens Juss.	Malvaceae	7	4	0.08	0.469
Pterocarpus santalinoides DC.	Fabaceae	7	4	0.08	0.469
Capparis sepiaria L.	Capparaceae	4	12	0.25	0.462
Combretum aculeatum Vent.	Combretaceae	6	6	0.13	0.453
Combretum adenogonium Steud. ex A.Rich.	Combretaceae	6	6	0.13	0.453
Hyphaene thebaica (L.) Mart.	Arecaceae	6	6	0.13	0.453
Isoberlinia doka Craib & Stapf	Fabaceae	6	6	0.13	0.453
Maerua angolensis DC.	Capparaceae	6	6	0.13	0.453
Acacia erythrocalyx Brenan	Fabaceae	6	5	0.1	0.433
Anacardium occidentale L.	Anacardiaceae	6	5	0.1	0.433
Hexalobus monopetalus (A.Rich.) Engl. & Diels	Annonaceae	6	5	0.1	0.433
Hymenocardia acida Tul.	Phyllanthaceae	6	5	0.1	0.433
Kigelia africana (Lam.) Benth.	Bignoniaceae	6	5	0.1	0.433
Albizia zygia (DC.) J.F.Macbr.	Fabaceae	7	2	0.04	0.429
Combretum molle R.Br. ex G.Don	Combretaceae	5	7	0.15	0.418
Flueggea virosa (Roxb. ex Willd.) Voigt	Phyllanthaceae	5	7	0.15	0.418
Cola cordifolia (Cav.) R.Br.	Malvaceae	6	4	0.08	0.413
Combretum collinum Fresen.	Combretaceae	6	4	0.08	0.413
Phoenix dactylifera L.	Arecaceae	6	4	0.08	0.413
Sorghum bicolor (L.) Moench	Poaceae	6	4	0.08	0.413
Syzygium guineense (Willd.) DC.	Myrtaceae	6	4	0.08	0.413
Cassia siamea Lam.	Fabaceae	4	9	0.19	0.402
Zea mays L.	Poaceae	5	6	0.13	0.398
Allophylus africanus P.Beauv.	Sapindaceae	6	3	0.06	0.393
Bridelia ferruginea Benth.	Phyllanthaceae	6	3	0.06	0.393
Cajanus cajan (L.) Millsp.	Fabaceae	6	3	0.06	0.393
Celtis toka (Forssk.) Hepper & J.R.I.Wood	Cannabaceae	6	3	0.06	0.393
Grewia villosa Willd.	Malvaceae	6	3	0.06	0.393
Lannea barteri (Oliv.) Engl.	Anacardiaceae	6	3	0.06	0.393
Ozoroa obovata (Oliv.) R.Fern. & A.Fern.	Anacardiaceae	6	3	0.06	0.393
Sporobolus pyramidalis P.Beauv.	Poaceae	6	3	0.06	0.393
Cochlospermum tinctorium Perr. ex A.Rich.	Bixaceae	4	8	0.17	0.382
Psidium guajava L.	Myrtaceae	4	8	0.17	0.382
Acacia ataxacantha DC.	Fabaceae	5	5	0.1	0.378
Grewia mollis Juss.	Malvaceae	5	5	0.1	0.378
Jatropha gossypiifolia L.	Euphorbiaceae	5	5	0.1	0.378
Detarium senegalense J.F.Gmel.	Fabaceae	6	2	0.04	0.373
Dialium guineense Willd.	Fabaceae	6	2	0.04	0.373
Imperata cylindrica (L.) Raeusch.	Poaceae	6	2	0.04	0.373
Phyllanthus reticulatus Poir.	Phyllanthaceae	6	2	0.04	0.373
Ziziphus abyssinica A.Rich.	Rhamnaceae	6	2	0.04	0.373
Boswellia dalzielii Hutch.	Burseraceae	4	7	0.15	0.362
Ficus ingens (Miq.) Miq.	Moraceae	4	7	0.15	0.362
Xeroderris stuhlmannii (Taub.) Mendonça & E.C.Sousa	Fabaceae	4	7	0.15	0.362
Andira inermis (W.Wright) DC.	Fabaceae	5	4	0.08	0.358
Eleusine indica (L.) Gaertn.	Poaceae	5	4	0.08	0.358
Uapaca togoensis Pax	Phyllanthaceae	5	4	0.08	0.358
Zanthoxylum zanthoxyloides (Lam.) Zepern. & Timler	Rutaceae	5	4	0.08	0.358
Bridelia micrantha (Hochst.) Baill.	Phyllanthaceae	6	1	0.02	0.353
Eragrostis ciliaris (L.) R.Br.	Poaceae	6	1	0.02	0.353
Gliricidia sepium (Jacq.) Walp.	Fabaceae	6	1	0.02	0.353
Pouteria alnifolia (Baker) Roberty	Sapotaceae	6	1	0.02	0.353
Rhus crenulata A.Rich.	Anacardiaceae	6	1	0.02	0.353
Ziziphus spina-christi (L.) Desf.	Rhamnaceae	6	1	0.02	0.353
Vernonia colorata (Willd.) Drake	Asteraceae	3	9	0.19	0.347
Cymbopogon caesius (Nees ex Hook. & Arn.) Stapf	Poaceae	4	6	0.13	0.342
Erythrina senegalensis A.DC.	Fabaceae	4	6	0.13	0.342
Jatropha curcas L.	Euphorbiaceae	4	6	0.13	0.342
Acacia ehrenbergiana Hayne	Fabaceae	5	3	0.06	0.338
Acacia laeta R.Br. ex Benth.	Fabaceae	5	3	0.06	0.338
Bridelia scleroneura Müll.Arg.	Phyllanthaceae	5	3	0.06	0.338
Canavalia ensiformis (L.) DC.	Fabaceae	5	3	0.06	0.338
Cordia myxa L.	Boraginaceae	5	3	0.06	0.338
Cordia sinensis Lam.	Boraginaceae	5	3	0.06	0.338
Euphorbia balsamifera Aiton	Euphorbiaceae	5	3	0.06	0.338
Leptadenia pyrotechnica (Forssk.) Decne.	Apocynaceae	5	3	0.06	0.338
Leucaena leucocephala (Lam.) de Wit	Fabaceae	5	3	0.06	0.338
Lophira lanceolata Tiegh. ex Keay	Ochnaceae	5	3	0.06	0.338
Maranthes polyandra (Benth.) Prance	Chrysobalanaceae	5	3	0.06	0.338
Philenoptera laxiflora (Guill. & Perr.) Roberty	Fabaceae	5	3	0.06	0.338
Quassia undulata (Guill. & Perr.) F.Dietr.	Simaroubaceae	5	3	0.06	0.338
Smilax anceps Willd.	Smilacaceae	5	3	0.06	0.338
Uvaria chamae P.Beauv.	Annonaceae	5	3	0.06	0.338
Vitex chrysocarpa Planch. ex Benth.	Lamiaceae	5	3	0.06	0.338
Agelanthus dodoneifolius (DC.) Polhill & Wiens	Loranthaceae	3	8	0.17	0.327
Pavetta crassipes K.Schum.	Rubiaceae	3	8	0.17	0.327
Andropogon gayanus Kunth	Poaceae	4	5	0.1	0.322
Blepharis linariifolia Pers.	Acanthaceae	4	5	0.1	0.322
Cymbopogon schoenanthus (L.) Spreng.	Poaceae	4	5	0.1	0.322
Fadogia agrestis Schweinf. ex Hiern	Rubiaceae	4	5	0.1	0.322
Gardenia sokotensis Hutch.	Rubiaceae	4	5	0.1	0.322
Holarrhena floribunda (G.Don) T.Durand & Schinz	Apocynaceae	4	5	0.1	0.322
Baissea multiflora A.DC.	Apocynaceae	5	2	0.04	0.318
Dalbergia sissoo Roxb. ex. DC.	Fabaceae	5	2	0.04	0.318
Echinochloa pyramidalis (Lam.) Hitchc. & Chase	Poaceae	5	2	0.04	0.318
Ficus trichopoda Baker	Moraceae	5	2	0.04	0.318
Isoberlinia tomentosa (Harms) Craib & Stapf	Fabaceae	5	2	0.04	0.318
Lonchocarpus sericeus (Poir.) Kunth	Fabaceae	5	2	0.04	0.318
Ricinus communis L.	Euphorbiaceae	5	2	0.04	0.318
Terminalia schimperiana Hochst.	Combretaceae	5	2	0.04	0.318
Waltheria indica L.	Malvaceae	2	10	0.21	0.311
Cassia alata L.	Fabaceae	3	7	0.15	0.307
Crotalaria retusa L.	Fabaceae	3	7	0.15	0.307
Opilia amentacea Roxb.	Opiliaceae	3	7	0.15	0.307
Carapa procera DC.	Meliaceae	4	4	0.08	0.302
Carissa edulis (Forssk.) Vahl	Apocynaceae	4	4	0.08	0.302
Chrysopogon nigritanus (Benth.) Veldkamp	Poaceae	4	4	0.08	0.302
Elaeis guineensis Jacq.	Arecaceae	4	4	0.08	0.302
Grewia tenax (Forssk.) Fiori	Malvaceae	4	4	0.08	0.302
Landolphia heudelotii A.DC.	Apocynaceae	4	4	0.08	0.302
Oncoba spinosa Forssk.	Salicaceae	4	4	0.08	0.302
Raphia sudanica A.Chev.	Arecaceae	4	4	0.08	0.302
Acacia gerrardii Benth.	Fabaceae	5	1	0.02	0.298
Antidesma venosum E.Mey. ex Tul.	Euphorbiaceae	5	1	0.02	0.298
Celosia argentea L.	Amaranthaceae	5	1	0.02	0.298
Cordyla pinnata (Lepr. ex A.Rich.) Milne-Redh.	Fabaceae	5	1	0.02	0.298
Dactyloctenium aegyptium (L.) Willd.	Poaceae	5	1	0.02	0.298
Entada abyssinica Steud. ex A.Rich.	Fabaceae	5	1	0.02	0.298
Eragrostis gangetica (Roxb.) Steud.	Poaceae	5	1	0.02	0.298
Ficus asperifolia Miq.	Moraceae	5	1	0.02	0.298
Lannea egregia Engl. & K.Krause	Anacardiaceae	5	1	0.02	0.298
Spondias mombin L.	Anacardiaceae	5	1	0.02	0.298
Lagenaria siceraria (Molina) Standl.	Cucurbitaceae	3	6	0.13	0.287
Loeseneriella africana (Willd.) N.Hallé	Celastraceae	3	6	0.13	0.287
Paullinia pinnata L.	Sapindaceae	3	6	0.13	0.287
Abrus precatorius L.	Fabaceae	4	3	0.06	0.282
Acacia hockii De Wild.	Fabaceae	4	3	0.06	0.282
Grewia lasiodiscus K.Schum.	Malvaceae	4	3	0.06	0.282
Heteropogon contortus (L.) Roem. & Schult.	Poaceae	4	3	0.06	0.282
Markhamia tomentosa (Benth.) K.Schum. ex Engl.	Bignoniaceae	4	3	0.06	0.282
Oryza sativa L.	Poaceae	4	3	0.06	0.282
Pennisetum pedicellatum Trin.	Poaceae	4	3	0.06	0.282
Phyllanthus muellerianus (Kuntze) Exell	Phyllanthaceae	4	3	0.06	0.282
Tectona grandis L.f.	Lamiaceae	4	3	0.06	0.282
Blighia sapida K.D.Koenig	Sapindaceae	3	5	0.1	0.267
Ceratotheca sesamoides Endl.	Pedaliaceae	3	5	0.1	0.267
Corchorus olitorius L.	Malvaceae	3	5	0.1	0.267
Crotalaria naragutensis Hutch.	Fabaceae	3	5	0.1	0.267
Lawsonia inermis L.	Lythraceae	3	5	0.1	0.267
Berlinia grandiflora (Vahl) Hutch. & Dalziel	Fabaceae	4	2	0.04	0.262
Borassus akeassii Bayton. Ouédr. & Guinko	Arecaceae	4	2	0.04	0.262
Boscia salicifolia Oliv.	Capparaceae	4	2	0.04	0.262
Ctenium elegans Kunth	Poaceae	4	2	0.04	0.262
Digitaria exilis (Kippist) Stapf	Poaceae	4	2	0.04	0.262
Eragrostis pilosa (L.) P.Beauv.	Poaceae	4	2	0.04	0.262
Eragrostis tremula Hochst. ex Steud.	Poaceae	4	2	0.04	0.262
Erythrophleum africanum (Welw. ex Benth.) Harms	Fabaceae	4	2	0.04	0.262
Erythrophleum suaveolens (Guill. & Perr.) Brenan	Fabaceae	4	2	0.04	0.262
Gmelina arborea Roxb.	Lamiaceae	4	2	0.04	0.262
Panicum subalbidum Kunth	Poaceae	4	2	0.04	0.262
Parkinsonia aculeata L.	Fabaceae	4	2	0.04	0.262
Pennisetum glaucum (L.) R.Br.	Poaceae	4	2	0.04	0.262
Phoenix reclinata Jacq.	Arecaceae	4	2	0.04	0.262
Sesbania bispinosa (Jacq.) W.Wight	Fabaceae	4	2	0.04	0.262
Setaria pumila (Poir.) Roem. & Schult.	Poaceae	4	2	0.04	0.262
Terminalia mollis M.A.Lawson	Combretaceae	4	2	0.04	0.262
Vetiveria fulvibarbis (Trin.) Stapf	Poaceae	4	2	0.04	0.262
Voacanga africana Stapf	Apocynaceae	4	2	0.04	0.262
Carica papaya L.	Caricaceae	2	7	0.15	0.251
Chrysanthellum indicum DC.	Asteraceae	2	7	0.15	0.251
Indigofera tinctoria L.	Fabaceae	2	7	0.15	0.251
Cleome gynandra L.	Capparaceae	3	4	0.08	0.247
Cryptolepis sanguinolenta (Lindl.) Schltr.	Apocynaceae	3	4	0.08	0.247
Lippia chevalieri Moldenke	Verbenaceae	3	4	0.08	0.247
Vigna unguiculata (L.) Walp.	Fabaceae	3	4	0.08	0.247
Acacia amythethophylla Steud. ex A.Rich.	Fabaceae	4	1	0.02	0.242
Aristida sieberiana Trin.	Poaceae	4	1	0.02	0.242
Aristida stipoides Lam.	Poaceae	4	1	0.02	0.242
Bambusa vulgaris Schrad. ex J.C.Wendl.	Poaceae	4	1	0.02	0.242
Canarium schweinfurthii Engl.	Burseraceae	4	1	0.02	0.242
Digitaria horizontalis Willd.	Poaceae	4	1	0.02	0.242
Eragrostis cilianensis (All.) Vignolo ex Janch.	Poaceae	4	1	0.02	0.242
Ficus abutilifolia (Miq.) Miq.	Moraceae	4	1	0.02	0.242
Ficus capreifolia Delile	Moraceae	4	1	0.02	0.242
Ficus natalensis Hochst.	Moraceae	4	1	0.02	0.242
Ficus ovata Vahl	Moraceae	4	1	0.02	0.242
Ficus polita Vahl	Moraceae	4	1	0.02	0.242
Ficus umbellata Vahl	Moraceae	4	1	0.02	0.242
Ficus vogeliana (Miq.) Miq.	Moraceae	4	1	0.02	0.242
Guibourtia copallifera Benn.	Fabaceae	4	1	0.02	0.242
Lannea fruticosa (Hochst. ex A.Rich.) Engl.	Anacardiaceae	4	1	0.02	0.242
Margaritaria discoidea (Baill.) G.L.Webster	Phyllanthaceae	4	1	0.02	0.242
Paspalum scrobiculatum L.	Poaceae	4	1	0.02	0.242
Pennisetum unisetum (Nees) Benth.	Poaceae	4	1	0.02	0.242
Rottboellia cochinchinensis (Lour.) Clayton	Poaceae	4	1	0.02	0.242
Schizachyrium exile (Hochst.) Pilg.	Poaceae	4	1	0.02	0.242
Sesbania sesban (L.) Merr.	Fabaceae	4	1	0.02	0.242
Setaria verticillata (L.) P.Beauv.	Poaceae	4	1	0.02	0.242
Sorghum arundinaceum (Desv.) Stapf	Poaceae	4	1	0.02	0.242
Cassia occidentalis L.	Fabaceae	1	9	0.19	0.236
Hyptis spicigera Lam.	Lamiaceae	2	6	0.13	0.231
Amaranthus spinosus L.	Amaranthaceae	3	3	0.06	0.227
Andropogon chinensis (Nees) Merr.	Poaceae	3	3	0.06	0.227
Arachis hypogaea L.	Fabaceae	3	3	0.06	0.227
Boerhavia diffusa L.	Nyctaginaceae	3	3	0.06	0.227
Cadaba glandulosa Forssk.	Capparaceae	3	3	0.06	0.227
Capparis tomentosa Lam.	Capparaceae	3	3	0.06	0.227
Citrullus lanatus (Thunb.) Matsum. & Nakai	Cucurbitaceae	3	3	0.06	0.227
Commelina forskaolii Vahl	Commelinaceae	3	3	0.06	0.227
Cucumis metuliferus E.Mey. ex Naudin	Cucurbitaceae	3	3	0.06	0.227
Cyperus esculentus L.	Cyperaceae	3	3	0.06	0.227
Indigofera pulchra Willd.	Fabaceae	3	3	0.06	0.227
Loudetia simplex (Nees) C.E.Hubb.	Poaceae	3	3	0.06	0.227
Manilkara multinervis (Baker) Dubard	Sapotaceae	3	3	0.06	0.227
Pentadesma butyracea Sabine	Clusiaceae	3	3	0.06	0.227
Philenoptera cyanescens (Schumach. & Thonn.) Roberty	Fabaceae	3	3	0.06	0.227
Rourea minor (Gaertn.) Alston	Connaraceae	3	3	0.06	0.227
Saba comorensis (Bojer ex A.DC.) Pichon	Apocynaceae	3	3	0.06	0.227
Sansevieria liberica Gérôme & Labroy	Asparagaceae	3	3	0.06	0.227
Sesamum alatum Thonn.	Pedaliaceae	3	3	0.06	0.227
Sporobolus festivus Hochst. ex A.Rich.	Poaceae	3	3	0.06	0.227
Strophanthus sarmentosus DC.	Apocynaceae	3	3	0.06	0.227
Cassia singueana Delile	Fabaceae	2	5	0.1	0.211
Cochlospermum planchonii Hook.f.	Bixaceae	2	5	0.1	0.211
Hibiscus cannabinus L.	Malvaceae	2	5	0.1	0.211
Hibiscus sabdariffa L.	Malvaceae	2	5	0.1	0.211
Nicotiana tabacum L.	Solanaceae	2	5	0.1	0.211
Vitex madiensis Oliv.	Lamiaceae	2	5	0.1	0.211
Alchornea cordifolia (Schumach. & Thonn.) Müll.Arg.	Euphorbiaceae	3	2	0.04	0.207
Amaranthus viridis L.	Amaranthaceae	3	2	0.04	0.207
Bobgunnia madagascariensis (Desv.) J.H.Kirkbr. & Wiersema	Fabaceae	3	2	0.04	0.207
Breonadia salicina (Vahl) Hepper & J.R.I.Wood	Rubiaceae	3	2	0.04	0.207
Calamus deerratus G.Mann & H.Wendl.	Arecaceae	3	2	0.04	0.207
Cascabela thevetia (L.) Lippold	Apocynaceae	3	2	0.04	0.207
Casuarina equisetifolia L.	Casuarinaceae	3	2	0.04	0.207
Cissus aralioides (Baker) Planch.	Vitaceae	3	2	0.04	0.207
Citrullus colocynthis (L.) Schrad.	Cucurbitaceae	3	2	0.04	0.207
Cleome viscosa L.	Capparaceae	3	2	0.04	0.207
Clitoria ternatea L.	Fabaceae	3	2	0.04	0.207
Coldenia procumbens L.	Boraginaceae	3	2	0.04	0.207
Commelina benghalensis L.	Commelinaceae	3	2	0.04	0.207
Cucumis melo L.	Cucurbitaceae	3	2	0.04	0.207
Cyperus rotundus L.	Cyperaceae	3	2	0.04	0.207
Flacourtia indica (Burm.f.) Merr.	Salicaceae	3	2	0.04	0.207
Gomphrena globosa L.	Amaranthaceae	3	2	0.04	0.207
Ipomoea batatas (L.) Lam.	Convolvulaceae	3	2	0.04	0.207
Manihot esculenta Crantz	Euphorbiaceae	3	2	0.04	0.207
Melicoccus bijugatus Jacq.	Sapindaceae	3	2	0.04	0.207
Mimosa pigra L.	Fabaceae	3	2	0.04	0.207
Morelia senegalensis A.Rich.	Rubiaceae	3	2	0.04	0.207
Nymphaea lotus L.	Nymphaeaceae	3	2	0.04	0.207
Olax subscorpioidea Oliv.	Olacaceae	3	2	0.04	0.207
Oryza barthii A.Chev.	Poaceae	3	2	0.04	0.207
Oryza glaberrima Steud.	Poaceae	3	2	0.04	0.207
Panicum anabaptistum Steud.	Poaceae	3	2	0.04	0.207
Polycarpaea corymbosa (L.) Lam.	Caryophyllaceae	3	2	0.04	0.207
Polycarpaea linearifolia (DC.) DC.	Caryophyllaceae	3	2	0.04	0.207
Stylosanthes fruticosa (Retz.) Alston	Fabaceae	3	2	0.04	0.207
Tacazzea apiculata Oliv.	Apocynaceae	3	2	0.04	0.207
Terminalia ivorensis A.Chev.	Combretaceae	3	2	0.04	0.207
Xylopia acutiflora (Dunal) A.Rich.	Annonaceae	3	2	0.04	0.207
Xylopia aethiopica (Dunal) A.Rich.	Annonaceae	3	2	0.04	0.207
Zornia glochidiata Rchb. ex DC.	Fabaceae	3	2	0.04	0.207
Amaranthus graecizans L.	Amaranthaceae	2	4	0.08	0.191
Amaranthus hybridus L.	Amaranthaceae	2	4	0.08	0.191
Cassia obtusifolia L.	Fabaceae	2	4	0.08	0.191
Corchorus tridens L.	Malvaceae	2	4	0.08	0.191
Cussonia arborea Hochst. ex A.Rich.	Araliaceae	2	4	0.08	0.191
Desmodium velutinum (Willd.) DC.	Fabaceae	2	4	0.08	0.191
Ipomoea eriocarpa R.Br.	Convolvulaceae	2	4	0.08	0.191
Sansevieria senegambica Baker	Asparagaceae	2	4	0.08	0.191
Strychnos innocua Delile	Loganiaceae	2	4	0.08	0.191
Tephrosia bracteolata Guill. & Perr.	Fabaceae	2	4	0.08	0.191
Aerva javanica (Burm.f.) Juss. ex Schult.	Amaranthaceae	3	1	0.02	0.187
Albizia malacophylla (A.Rich.) Walp.	Fabaceae	3	1	0.02	0.187
Alternanthera sessilis (L.) DC.	Amaranthaceae	3	1	0.02	0.187
Aristida adscensionis L.	Poaceae	3	1	0.02	0.187
Brachiaria lata (Schumach.) C.E.Hubb.	Poaceae	3	1	0.02	0.187
Chasmopodium caudatum (Hack.) Stapf	Poaceae	3	1	0.02	0.187
Crescentia cujete L.	Bignoniaceae	3	1	0.02	0.187
Cynodon dactylon (L.) Pers.	Poaceae	3	1	0.02	0.187
Digitaria ciliaris (Retz.) Koeler	Poaceae	3	1	0.02	0.187
Echinochloa colona (L.) Link	Poaceae	3	1	0.02	0.187
Eragrostis japonica (Thunb.) Trin.	Poaceae	3	1	0.02	0.187
Ficus vallis-choudae Delile	Moraceae	3	1	0.02	0.187
Gloriosa superba L.	Colchicaceae	3	1	0.02	0.187
Grewia barteri Burret	Malvaceae	3	1	0.02	0.187
Hyparrhenia involucrata Stapf	Poaceae	3	1	0.02	0.187
Hyparrhenia rufa (Nees) Stapf	Poaceae	3	1	0.02	0.187
Hyperthelia dissoluta (Nees ex Steud.) Clayton	Poaceae	3	1	0.02	0.187
Jasminum dichotomum Vahl	Oleaceae	3	1	0.02	0.187
Manilkara obovata (Sabine & G.Don) J.H.Hemsl.	Sapotaceae	3	1	0.02	0.187
Melinis repens (Willd.) Zizka	Poaceae	3	1	0.02	0.187
Mikania chevalieri (C.D.Adams) W.C.Holmes & McDaniel	Asteraceae	3	1	0.02	0.187
Monocymbium ceresiiforme (Nees) Stapf	Poaceae	3	1	0.02	0.187
Mucuna pruriens (L.) DC.	Fabaceae	3	1	0.02	0.187
Ochna rhizomatosa (Tiegh.) Keay	Ochnaceae	3	1	0.02	0.187
Oryza longistaminata A.Chev. & Roehr.	Poaceae	3	1	0.02	0.187
Panicum phragmitoides Stapf	Poaceae	3	1	0.02	0.187
Pennisetum polystachion (L.) Schult.	Poaceae	3	1	0.02	0.187
Pennisetum purpureum Schumach.	Poaceae	3	1	0.02	0.187
Phragmites karka (Retz.) Steud.	Poaceae	3	1	0.02	0.187
Psophocarpus palustris Desv.	Fabaceae	3	1	0.02	0.187
Rhus longipes Engl.	Anacardiaceae	3	1	0.02	0.187
Schizachyrium sanguineum (Retz.) Alston	Poaceae	3	1	0.02	0.187
Schoenefeldia gracilis Kunth	Poaceae	3	1	0.02	0.187
Stenotaphrum secundatum (Walter) Kuntze	Poaceae	3	1	0.02	0.187
Triclisia subcordata Oliv.	Menispermaceae	3	1	0.02	0.187
Vossia cuspidata (Roxb.) Griff.	Poaceae	3	1	0.02	0.187
Abelmoschus esculentus (L.) Moench	Malvaceae	2	3	0.06	0.171
Allium cepa L.	Alliaceae	2	3	0.06	0.171
Allium sativum L.	Alliaceae	2	3	0.06	0.171
Annona squamosa L.	Annonaceae	2	3	0.06	0.171
Antiaris toxicaria Lesch.	Moraceae	2	3	0.06	0.171
Bergia suffruticosa (Delile) Fenzl	Elatinaceae	2	3	0.06	0.171
Bixa orellana L.	Bixaceae	2	3	0.06	0.171
Capsicum frutescens L.	Solanaceae	2	3	0.06	0.171
Celosia trigyna L.	Amaranthaceae	2	3	0.06	0.171
Crotalaria pallida Aiton	Fabaceae	2	3	0.06	0.171
Cucumis prophetarum L.	Cucurbitaceae	2	3	0.06	0.171
Euphorbia poissoni Pax	Euphorbiaceae	2	3	0.06	0.171
Grewia cissoides Hutch. & Dalziel	Malvaceae	2	3	0.06	0.171
Hoslundia opposita Vahl	Lamiaceae	2	3	0.06	0.171
Hygrophila auriculata (Schumach.) Heine	Acanthaceae	2	3	0.06	0.171
Indigofera bracteolata DC.	Fabaceae	2	3	0.06	0.171
Indigofera dendroides Jacq.	Fabaceae	2	3	0.06	0.171
Ochna schweinfurthiana F.Hoffm.	Ochnaceae	2	3	0.06	0.171
Ocimum basilicum L.	Lamiaceae	2	3	0.06	0.171
Portulaca oleracea L.	Portulacaceae	2	3	0.06	0.171
Stylochaeton hypogaeus Lepr.	Araceae	2	3	0.06	0.171
Vernonia cinerea (L.) Less.	Asteraceae	2	3	0.06	0.171
Vigna subterranea (L.) Verdc.	Fabaceae	2	3	0.06	0.171
Hibiscus scotellii Baker f.	Malvaceae	3	0	0	0.167
Acanthospermum hispidum DC.	Asteraceae	1	5	0.1	0.156
Dicoma tomentosa Cass.	Asteraceae	1	5	0.1	0.156
Allophylus spicatus (Poir.) Radlk.	Sapindaceae	2	2	0.04	0.151
Amaranthus dubius Mart. ex Thell.	Amaranthaceae	2	2	0.04	0.151
Ambrosia maritima L.	Asteraceae	2	2	0.04	0.151
Ananas comosus (L.) Merr.	Bromeliaceae	2	2	0.04	0.151
Andropogon canaliculatus Schumach.	Poaceae	2	2	0.04	0.151
Andropogon pseudapricus Stapf	Poaceae	2	2	0.04	0.151
Andropogon tectorum Schumach. & Thonn.	Poaceae	2	2	0.04	0.151
Annona muricata L.	Annonaceae	2	2	0.04	0.151
Anthostema senegalense A.Juss.	Euphorbiaceae	2	2	0.04	0.151
Asystasia gangetica (L.) T.Anderson	Acanthaceae	2	2	0.04	0.151
Boerhavia erecta L.	Nyctaginaceae	2	2	0.04	0.151
Cenchrus biflorus Roxb.	Poaceae	2	2	0.04	0.151
Centaurea senegalensis DC.	Asteraceae	2	2	0.04	0.151
Chrozophora brocchiana (Vis.) Schweinf.	Euphorbiaceae	2	2	0.04	0.151
Chrozophora senegalensis (Lam.) A.Juss. ex Spreng.	Euphorbiaceae	2	2	0.04	0.151
Cienfuegosia digitata Cav.	Malvaceae	2	2	0.04	0.151
Citrus limon (L.) Burm.f.	Rutaceae	2	2	0.04	0.151
Corchorus fascicularis Lam.	Malvaceae	2	2	0.04	0.151
Croton pseudopulchellus Pax	Euphorbiaceae	2	2	0.04	0.151
Ctenium newtonii Hack.	Poaceae	2	2	0.04	0.151
Cyphostemma adenocaule (Steud. ex A.Rich.) Desc. ex Wild & R.B.Drumm.	Vitaceae	2	2	0.04	0.151
Dicliptera paniculata (Forssk.) I.Darbysh.	Acanthaceae	2	2	0.04	0.151
Diheteropogon hagerupii Hitchc.	Poaceae	2	2	0.04	0.151
Dioscorea bulbifera L.	Dioscoreaceae	2	2	0.04	0.151
Dioscorea cayenensis Lam.	Dioscoreaceae	2	2	0.04	0.151
Dioscorea dumetorum (Kunth) Pax	Dioscoreaceae	2	2	0.04	0.151
Dioscorea praehensilis Benth.	Dioscoreaceae	2	2	0.04	0.151
Dissotis thollonii Cogn. ex Büttner	Melastomataceae	2	2	0.04	0.151
Dodonaea viscosa Jacq.	Sapindaceae	2	2	0.04	0.151
Dyschoriste nagchana (Nees) Bennet	Acanthaceae	2	2	0.04	0.151
Echinochloa stagnina (Retz.) P.Beauv.	Poaceae	2	2	0.04	0.151
Eclipta prostrata (L.) L.	Asteraceae	2	2	0.04	0.151
Flemingia faginea (Guill. & Perr.) Baker	Fabaceae	2	2	0.04	0.151
Glossonema boveanum (Decne.) Decne.	Apocynaceae	2	2	0.04	0.151
Grewia carpinifolia Juss.	Malvaceae	2	2	0.04	0.151
Hyparrhenia cyanescens (Stapf) Stapf	Poaceae	2	2	0.04	0.151
Indigofera diphylla Vent.	Fabaceae	2	2	0.04	0.151
Indigofera hirsuta L.	Fabaceae	2	2	0.04	0.151
Indigofera paniculata Vahl ex Pers.	Fabaceae	2	2	0.04	0.151
Indigofera simplicifolia Lam.	Fabaceae	2	2	0.04	0.151
Indigofera suffruticosa Mill.	Fabaceae	2	2	0.04	0.151
Kalanchoe crenata (Andrews) Haw.	Crassulaceae	2	2	0.04	0.151
Lantana camara L.	Verbenaceae	2	2	0.04	0.151
Lippia multiflora Moldenke	Verbenaceae	2	2	0.04	0.151
Luffa cylindrica (L.) M.Roem.	Cucurbitaceae	2	2	0.04	0.151
Melastomastrum capitatum (Vahl) A.Fern. & R.Fern.	Melastomataceae	2	2	0.04	0.151
Melia azedarach L.	Meliaceae	2	2	0.04	0.151
Momordica balsamina L.	Cucurbitaceae	2	2	0.04	0.151
Monechma ciliatum (Jacq.) Milne-Redh.	Acanthaceae	2	2	0.04	0.151
Musa x paradisiaca L.	Musaceae	2	2	0.04	0.151
Panicum fluviicola Steud.	Poaceae	2	2	0.04	0.151
Passiflora foetida L.	Passifloraceae	2	2	0.04	0.151
Pergularia daemia (Forssk.) Chiov.	Apocynaceae	2	2	0.04	0.151
Persea americana Mill.	Lauraceae	2	2	0.04	0.151
Polygala arenaria Willd.	Polygalaceae	2	2	0.04	0.151
Rauvolfia vomitoria Afzel.	Apocynaceae	2	2	0.04	0.151
Saccharum officinarum L.	Poaceae	2	2	0.04	0.151
Sesamum indicum L.	Pedaliaceae	2	2	0.04	0.151
Sesbania pachycarpa DC.	Fabaceae	2	2	0.04	0.151
Shirakiopsis elliptica (Hochst.) Esser	Euphorbiaceae	2	2	0.04	0.151
Sida cordifolia L.	Malvaceae	2	2	0.04	0.151
Siphonochilus aethiopicus (Schweinf.) B.L.Burtt	Zingiberaceae	2	2	0.04	0.151
Solanum nigrum L.	Solanaceae	2	2	0.04	0.151
Sphenostylis schweinfurthii Harms	Fabaceae	2	2	0.04	0.151
Strophanthus hispidus DC.	Apocynaceae	2	2	0.04	0.151
Synsepalum brevipes (Baker) T.D.Penn.	Sapotaceae	2	2	0.04	0.151
Tacca leontopetaloides (L.) Kuntze	Taccaceae	2	2	0.04	0.151
Tephrosia linearis (Willd.) Pers.	Fabaceae	2	2	0.04	0.151
Tephrosia purpurea (L.) Pers.	Fabaceae	2	2	0.04	0.151
Tetracera alnifolia Willd.	Dilleniaceae	2	2	0.04	0.151
Trianthema portulacastrum L.	Aizoaceae	2	2	0.04	0.151
Tricalysia okelensis Hiern	Rubiaceae	2	2	0.04	0.151
Urochloa trichopus (Hochst.) Stapf	Poaceae	2	2	0.04	0.151
Vernonia pumila Kotschy & Peyr.	Asteraceae	2	2	0.04	0.151
Voacanga thouarsii Roem. & Schult.	Apocynaceae	2	2	0.04	0.151
Cassia nigricans Vahl	Fabaceae	1	4	0.08	0.136
Desmodium gangeticum (L.) DC.	Fabaceae	1	4	0.08	0.136
Euphorbia convolvuloides Hochst. ex Benth.	Euphorbiaceae	1	4	0.08	0.136
Euphorbia hirta L.	Euphorbiaceae	1	4	0.08	0.136
Excoecaria grahamii Stapf	Euphorbiaceae	1	4	0.08	0.136
Indigofera nigritana Hook.f.	Fabaceae	1	4	0.08	0.136
Ipomoea asarifolia (Desr.) Roem. & Schult.	Convolvulaceae	1	4	0.08	0.136
Ocimum americanum L.	Lamiaceae	1	4	0.08	0.136
Sida acuta Burm.f.	Malvaceae	1	4	0.08	0.136
Striga hermonthica (Delile) Benth.	Orobanchaceae	1	4	0.08	0.136
Stylosanthes erecta P.Beauv.	Fabaceae	1	4	0.08	0.136
Acridocarpus chevalieri Sprague	Malpighiaceae	2	1	0.02	0.131
Acroceras amplectens Stapf	Poaceae	2	1	0.02	0.131
Aeschynomene afraspera J.Léonard	Fabaceae	2	1	0.02	0.131
Agave sisalana Perrine	Agavaceae	2	1	0.02	0.131
Alternanthera nodiflora R.Br.	Amaranthaceae	2	1	0.02	0.131
Alysicarpus ovalifolius (Schumach.) J.Léonard	Fabaceae	2	1	0.02	0.131
Amorphophallus dracontioides (Engl.) N.E.Br.	Araceae	2	1	0.02	0.131
Ancylobotrys amoena Hua	Apocynaceae	2	1	0.02	0.131
Andropogon africanus Franch.	Poaceae	2	1	0.02	0.131
Andropogon perligulatus Stapf	Poaceae	2	1	0.02	0.131
Andropogon schirensis A.Rich.	Poaceae	2	1	0.02	0.131
Aristida kerstingii Pilg.	Poaceae	2	1	0.02	0.131
Aristida mutabilis Trin. & Rupr.	Poaceae	2	1	0.02	0.131
Brachiaria deflexa (Schumach.) C.E.Hubb. ex Robyns	Poaceae	2	1	0.02	0.131
Brachiaria stigmatisata (Mez) Stapf	Poaceae	2	1	0.02	0.131
Brachiaria villosa (Lam.) A.Camus	Poaceae	2	1	0.02	0.131
Capsicum annuum L.	Solanaceae	2	1	0.02	0.131
Cenchrus ciliaris L.	Poaceae	2	1	0.02	0.131
Cenchrus prieurii (Kunth) Maire	Poaceae	2	1	0.02	0.131
Centrosema pubescens Benth.	Fabaceae	2	1	0.02	0.131
Chloris robusta Stapf	Poaceae	2	1	0.02	0.131
Chloris virgata Sw.	Poaceae	2	1	0.02	0.131
Chrysochloa hindsii C.E.Hubb.	Poaceae	2	1	0.02	0.131
Citrus reticulata Blanco	Rutaceae	2	1	0.02	0.131
Combretum lecardii Engl. & Diels	Combretaceae	2	1	0.02	0.131
Combretum nioroense Aubrév. ex Keay	Combretaceae	2	1	0.02	0.131
Cyperus articulatus L.	Cyperaceae	2	1	0.02	0.131
Desmodium adscendens (Sw.) DC.	Fabaceae	2	1	0.02	0.131
Desmodium hirtum Guill. & Perr.	Fabaceae	2	1	0.02	0.131
Digitaria gayana (Kunth) A.Chev. ex Stapf	Poaceae	2	1	0.02	0.131
Digitaria leptorhachis (Pilg.) Stapf	Poaceae	2	1	0.02	0.131
Diheteropogon amplectens (Nees) Clayton	Poaceae	2	1	0.02	0.131
Dinebra retroflexa (Vahl) Panz.	Poaceae	2	1	0.02	0.131
Dombeya quinqueseta (Delile) Exell	Malvaceae	2	1	0.02	0.131
Ekebergia capensis Sparrm.	Meliaceae	2	1	0.02	0.131
Elionurus ciliaris Kunth	Poaceae	2	1	0.02	0.131
Elionurus elegans Kunth	Poaceae	2	1	0.02	0.131
Eragrostis squamata (Lam.) Steud.	Poaceae	2	1	0.02	0.131
Eriochloa fatmensis (Hochst. & Steud.) Clayton	Poaceae	2	1	0.02	0.131
Eriosema psoraloides (Lam.) G.Don	Fabaceae	2	1	0.02	0.131
Eriosema pulcherrimum Taub.	Fabaceae	2	1	0.02	0.131
Euphorbia unispina N.E.Br.	Euphorbiaceae	2	1	0.02	0.131
Ficus cordata Thunb.	Moraceae	2	1	0.02	0.131
Gymnema sylvestre (Retz.) Schult.	Apocynaceae	2	1	0.02	0.131
Haematostaphis barteri Hook.f.	Anacardiaceae	2	1	0.02	0.131
Heliotropium zeylanicum (Burm.f.) Lam.	Boraginaceae	2	1	0.02	0.131
Hibiscus rostellatus Guill. & Perr.	Malvaceae	2	1	0.02	0.131
Hyparrhenia diplandra (Hack.) Stapf	Poaceae	2	1	0.02	0.131
Indigofera capitata Kotschy	Fabaceae	2	1	0.02	0.131
Ipomoea aquatica Forssk.	Convolvulaceae	2	1	0.02	0.131
Ischaemum rugosum Salisb.	Poaceae	2	1	0.02	0.131
Keetia venosa (Oliv.) Bridson	Rubiaceae	2	1	0.02	0.131
Landolphia dulcis (Sabine) Pichon	Apocynaceae	2	1	0.02	0.131
Lantana ukambensis (Vatke) Verdc.	Verbenaceae	2	1	0.02	0.131
Laportea aestuans (L.) Chew	Urticaceae	2	1	0.02	0.131
Lecaniodiscus cupanioides Planch.	Sapindaceae	2	1	0.02	0.131
Lepidium sativum L.	Brassicaceae	2	1	0.02	0.131
Leptothrium senegalense (Kunth) Clayton	Poaceae	2	1	0.02	0.131
Lycopersicon esculentum Mill.	Solanaceae	2	1	0.02	0.131
Macrosphyra longistyla (DC.) Hiern	Rubiaceae	2	1	0.02	0.131
Manihot glaziovii Müll.Arg.	Euphorbiaceae	2	1	0.02	0.131
Nymphaea maculata Schumach. & Thonn.	Nymphaeaceae	2	1	0.02	0.131
Ocimum gratissimum L.	Lamiaceae	2	1	0.02	0.131
Panicum laetum Kunth	Poaceae	2	1	0.02	0.131
Panicum pansum Rendle	Poaceae	2	1	0.02	0.131
Pavetta corymbosa (DC.) F.N.Williams	Rubiaceae	2	1	0.02	0.131
Phragmites australis (Cav.) Steud.	Poaceae	2	1	0.02	0.131
Plumbago zeylanica L.	Plumbaginaceae	2	1	0.02	0.131
Plumeria rubra L.	Apocynaceae	2	1	0.02	0.131
Portulaca grandiflora Hook.	Portulacaceae	2	1	0.02	0.131
Rhytachne triaristata (Steud.) Stapf	Poaceae	2	1	0.02	0.131
Saccharum spontaneum L.	Poaceae	2	1	0.02	0.131
Sacciolepis africana C.E.Hubb. & Snowden	Poaceae	2	1	0.02	0.131
Salvadora persica L.	Salvadoraceae	2	1	0.02	0.131
Schizachyrium platyphyllum (Franch.) Stapf	Poaceae	2	1	0.02	0.131
Scleria depressa (C.B.Clarke) Nelmes	Cyperaceae	2	1	0.02	0.131
Sesamum radiatum Schumach. & Thonn.	Pedaliaceae	2	1	0.02	0.131
Setaria barbata (Lam.) Kunth	Poaceae	2	1	0.02	0.131
Setaria sphacelata (Schumach.) Stapf & C.E.Hubb. ex M.B.Moss	Poaceae	2	1	0.02	0.131
Solanum aethiopicum L.	Solanaceae	2	1	0.02	0.131
Synsepalum pobeguinianum (Pierre ex Lecomte) Aké Assi & L.Gaut.	Sapotaceae	2	1	0.02	0.131
Talinum triangulare (Jacq.) Willd.	Talinaceae	2	1	0.02	0.131
Teramnus labialis (L.f.) Spreng.	Fabaceae	2	1	0.02	0.131
Thonningia sanguinea Vahl	Balanophoraceae	2	1	0.02	0.131
Uraria picta (Jacq.) DC.	Fabaceae	2	1	0.02	0.131
Urochloa jubata (Fig. & De Not.) Sosef	Poaceae	2	1	0.02	0.131
Vigna adenantha (G.Mey.) Maréchal & Mascherpa & Stainier	Fabaceae	2	1	0.02	0.131
Cayratia gracilis (Guill. & Perr.) Suess.	Vitaceae	1	3	0.06	0.116
Cola laurifolia Mast.	Malvaceae	1	3	0.06	0.116
Cola nitida (Vent.) Schott & Endl.	Malvaceae	1	3	0.06	0.116
Indigofera macrocalyx Guill. & Perr.	Fabaceae	1	3	0.06	0.116
Lepidagathis anobrya Nees	Acanthaceae	1	3	0.06	0.116
Leucas martinicensis (Jacq.) R.Br.	Lamiaceae	1	3	0.06	0.116
Mitracarpus hirtus (L.) DC.	Rubiaceae	1	3	0.06	0.116
Pupalia lappacea (L.) A.Juss.	Amaranthaceae	1	3	0.06	0.116
Scoparia dulcis L.	Plantaginaceae	1	3	0.06	0.116
Tapinanthus bangwensis (Engl. & K.Krause) Danser	Loranthaceae	1	3	0.06	0.116
Tapinanthus globiferus (A.Rich.) Tiegh.	Loranthaceae	1	3	0.06	0.116
Tridax procumbens L.	Asteraceae	1	3	0.06	0.116
Ficus dicranostyla Mildbr.	Moraceae	2	0	0	0.111
Peperomia pellucida H.B. & K.	Piperaceae	2	0	0	0.111
Phaseolus vulgaris L.	Fabaceae	2	0	0	0.111
Acalypha ciliata Forssk.	Euphorbiaceae	1	2	0.04	0.096
Achyranthes aspera L.	Amaranthaceae	1	2	0.04	0.096
Aeschynomene sensitiva Sw.	Fabaceae	1	2	0.04	0.096
Afraegle paniculata (Schumach.) Engl.	Rutaceae	1	2	0.04	0.096
Ageratum conyzoides L.	Asteraceae	1	2	0.04	0.096
Albizia lebbeck (L.) Benth.	Fabaceae	1	2	0.04	0.096
Aloe buettneri A.Berger	Xanthorrhoeaceae	1	2	0.04	0.096
Alternanthera pungens Kunth	Amaranthaceae	1	2	0.04	0.096
Ampelocissus africana (Lour.) Merr.	Vitaceae	1	2	0.04	0.096
Anthocleista djalonensis A.Chev.	Gentianaceae	1	2	0.04	0.096
Asparagus africanus Lam.	Asparagaceae	1	2	0.04	0.096
Asparagus flagellaris (Kunth) Baker	Asparagaceae	1	2	0.04	0.096
Astraea lobata (L.) Klotzsch	Euphorbiaceae	1	2	0.04	0.096
Biophytum umbraculum Welw.	Oxalidaceae	1	2	0.04	0.096
Blainvillea gayana Cass.	Asteraceae	1	2	0.04	0.096
Brachiaria ramosa (L.) Stapf	Poaceae	1	2	0.04	0.096
Calyptrochilum christyanum (Rchb.f.) Summerh.	Orchidaceae	1	2	0.04	0.096
Cassia italica (Mill.) Lam. ex F.W.Andrews	Fabaceae	1	2	0.04	0.096
Cassia podocarpa Guill. & Perr.	Fabaceae	1	2	0.04	0.096
Ceropegia sankuruensis Schltr.	Apocynaceae	1	2	0.04	0.096
Cissus quadrangularis L.	Vitaceae	1	2	0.04	0.096
Citrus aurantium L.	Rutaceae	1	2	0.04	0.096
Combretum racemosum P.Beauv.	Combretaceae	1	2	0.04	0.096
Combretum sericeum G.Don	Combretaceae	1	2	0.04	0.096
Commelina diffusa Burm.f.	Commelinaceae	1	2	0.04	0.096
Costus spectabilis (Fenzl) K.Schum.	Costaceae	1	2	0.04	0.096
Cucurbita pepo L.	Cucurbitaceae	1	2	0.04	0.096
Curculigo pilosa (Schumach. & Thonn.) Engl.	Hypoxidaceae	1	2	0.04	0.096
Diospyros elliotii (Hiern) F.White	Ebenaceae	1	2	0.04	0.096
Eriosema glomeratum (Guill. & Perr.) Hook.f.	Fabaceae	1	2	0.04	0.096
Euphorbia sudanica A.Chev.	Euphorbiaceae	1	2	0.04	0.096
Evolvulus alsinoides (L.) L.	Convolvulaceae	1	2	0.04	0.096
Heliotropium indicum L.	Boraginaceae	1	2	0.04	0.096
Hyptis suaveolens Poit.	Lamiaceae	1	2	0.04	0.096
Indigofera leptoclada Harms	Fabaceae	1	2	0.04	0.096
Indigofera stenophylla Guill. & Perr.	Fabaceae	1	2	0.04	0.096
Landolphia hirsuta (Hua) Pichon	Apocynaceae	1	2	0.04	0.096
Linzia nigritiana (Oliv. & Hiern) Isawumi	Asteraceae	1	2	0.04	0.096
Loudetia togoensis (Pilg.) C.E.Hubb.	Poaceae	1	2	0.04	0.096
Macledium sessiliflorum (Harv.) S.Ortiz	Asteraceae	1	2	0.04	0.096
Martynia annua L.	Martyniaceae	1	2	0.04	0.096
Mollugo nudicaulis Lam.	Molluginaceae	1	2	0.04	0.096
Monotes kerstingii Gilg	Dipterocarpaceae	1	2	0.04	0.096
Nelsonia canescens (Lam.) Spreng.	Acanthaceae	1	2	0.04	0.096
Pachycarpus lineolatus (Decne.) Bullock	Apocynaceae	1	2	0.04	0.096
Pandiaka angustifolia (Vahl) Hepper	Amaranthaceae	1	2	0.04	0.096
Pennisetum violaceum (Lam.) Rich.	Poaceae	1	2	0.04	0.096
Periploca nigrescens Afzel.	Apocynaceae	1	2	0.04	0.096
Phaulopsis imbricata (Forssk.) Sweet	Acanthaceae	1	2	0.04	0.096
Portulaca quadrifida L.	Portulacaceae	1	2	0.04	0.096
Psychotria psychotrioides (DC.) Roberty	Rubiaceae	1	2	0.04	0.096
Rhynchosia buettneri Harms	Fabaceae	1	2	0.04	0.096
Rhynchosia pycnostachya (DC.) Meikle	Fabaceae	1	2	0.04	0.096
Rourea coccinea (Thonn. ex Schumach.) Benth.	Connaraceae	1	2	0.04	0.096
Rytigynia senegalensis Blume	Rubiaceae	1	2	0.04	0.096
Schizachyrium urceolatum (Hack.) Stapf	Poaceae	1	2	0.04	0.096
Solanum incanum L.	Solanaceae	1	2	0.04	0.096
Sphaeranthus senegalensis DC.	Asteraceae	1	2	0.04	0.096
Stachytarpheta indica (L.) Vahl	Verbenaceae	1	2	0.04	0.096
Tinnea barteri Gürke	Lamiaceae	1	2	0.04	0.096
Trema orientalis (L.) Blume	Cannabaceae	1	2	0.04	0.096
Wissadula rostrata (Schumach.) Hook.f.	Malvaceae	1	2	0.04	0.096
Xysmalobium heudelotianum Decne.	Apocynaceae	1	2	0.04	0.096
Abelmoschus moschatus Medik.	Malvaceae	1	1	0.02	0.076
Abrus canescens Welw. ex Baker	Fabaceae	1	1	0.02	0.076
Abrus melanospermus Hassk.	Fabaceae	1	1	0.02	0.076
Abutilon grandifolium (Willd.) Sweet	Malvaceae	1	1	0.02	0.076
Abutilon pannosum (G.Forst.) Schltdl.	Malvaceae	1	1	0.02	0.076
Acalypha hispida Burm.f.	Euphorbiaceae	1	1	0.02	0.076
Acalypha segetalis Müll.Arg.	Euphorbiaceae	1	1	0.02	0.076
Acmella uliginosa (Sw.) Cass.	Asteraceae	1	1	0.02	0.076
Aerva lanata (L.) Juss. ex Schult.	Amaranthaceae	1	1	0.02	0.076
Aeschynomene indica L.	Fabaceae	1	1	0.02	0.076
Aframomum sceptrum (Oliv. & D.Hanb.) K.Schum.	Zingiberaceae	1	1	0.02	0.076
Allamanda cathartica L.	Apocynaceae	1	1	0.02	0.076
Aloe macrocarpa Tod.	Xanthorrhoeaceae	1	1	0.02	0.076
Alstonia congensis Engl.	Apocynaceae	1	1	0.02	0.076
Alysicarpus glumaceus (Vahl) DC.	Fabaceae	1	1	0.02	0.076
Alysicarpus rugosus (Willd.) DC.	Fabaceae	1	1	0.02	0.076
Alysicarpus zeyheri Harv.	Fabaceae	1	1	0.02	0.076
Amorphophallus abyssinicus (A.Rich.) N.E.Br.	Araceae	1	1	0.02	0.076
Amorphophallus baumannii (Engl.) N.E.Br.	Araceae	1	1	0.02	0.076
Amorphophallus johnsonii N.E.Br.	Araceae	1	1	0.02	0.076
Ampelocissus leonensis (Hook.f.) Planch.	Vitaceae	1	1	0.02	0.076
Ampelocissus multistriata (Baker) Planch.	Vitaceae	1	1	0.02	0.076
Anadelphia afzeliana (Rendle) Stapf	Poaceae	1	1	0.02	0.076
Anadelphia leptocoma (Trin.) Pilg.	Poaceae	1	1	0.02	0.076
Anchomanes difformis (Blume) Engl.	Araceae	1	1	0.02	0.076
Andropogon fastigiatus Sw.	Poaceae	1	1	0.02	0.076
Aneilema paludosum A.Chev.	Commelinaceae	1	1	0.02	0.076
Annona glauca Schumach. & Thonn.	Annonaceae	1	1	0.02	0.076
Antherotoma irvingiana (Hook.f.) Jacq.-Fél.	Melastomataceae	1	1	0.02	0.076
Anthocleista procera Lepr. ex A.Chev.	Gentianaceae	1	1	0.02	0.076
Apodostigma pallens (Planch. ex Oliv.) R.Wilczek	Celastraceae	1	1	0.02	0.076
Argemone mexicana L.	Papaveraceae	1	1	0.02	0.076
Argyreia nervosa (Burm.f.) Bojer	Convolvulaceae	1	1	0.02	0.076
Aristida funiculata Trin. & Rupr.	Poaceae	1	1	0.02	0.076
Aristida hordeacea Kunth	Poaceae	1	1	0.02	0.076
Aristida rhiniochloa Hochst.	Poaceae	1	1	0.02	0.076
Aristolochia albida Duch.	Aristolochiaceae	1	1	0.02	0.076
Aspilia africana (Pers.) C.D.Adams	Asteraceae	1	1	0.02	0.076
Aspilia helianthoides (Schumach. & Thonn.) Oliv. & Hiern	Asteraceae	1	1	0.02	0.076
Aspilia kotschyi (Sch.Bip.) Oliv.	Asteraceae	1	1	0.02	0.076
Aspilia rudis Oliv. & Hiern	Asteraceae	1	1	0.02	0.076
Bacopa hamiltoniana (Benth.) Wettst.	Plantaginaceae	1	1	0.02	0.076
Basella alba L.	Basellaceae	1	1	0.02	0.076
Basilicum polystachyon (L.) Moench	Lamiaceae	1	1	0.02	0.076
Bauhinia monandra Kurz	Fabaceae	1	1	0.02	0.076
Bauhinia purpurea L.	Fabaceae	1	1	0.02	0.076
Bidens engleri O.E.Schulz	Asteraceae	1	1	0.02	0.076
Bidens pilosa L.	Asteraceae	1	1	0.02	0.076
Blumea oloptera DC.	Asteraceae	1	1	0.02	0.076
Boerhavia coccinea Mill.	Nyctaginaceae	1	1	0.02	0.076
Bougainvillea glabra Choisy	Nyctaginaceae	1	1	0.02	0.076
Bougainvillea spectabilis Willd.	Nyctaginaceae	1	1	0.02	0.076
Brachiaria mutica (Forssk.) Stapf	Poaceae	1	1	0.02	0.076
Brachiaria serrata (Thunb.) Stapf	Poaceae	1	1	0.02	0.076
Brachiaria xantholeuca (Hack.) Stapf	Poaceae	1	1	0.02	0.076
Brassica oleracea L.	Brassicaceae	1	1	0.02	0.076
Bulbostylis boeckeleriana (Schweinf.) Beetle	Cyperaceae	1	1	0.02	0.076
Bulbostylis hispidula (Vahl) R.W.Haines	Cyperaceae	1	1	0.02	0.076
Caesalpinia pulcherrima (L.) Sw.	Fabaceae	1	1	0.02	0.076
Cajanus kerstingii Harms	Fabaceae	1	1	0.02	0.076
Caladium bicolor (Aiton) Vent.	Araceae	1	1	0.02	0.076
Canscora decussata (Roxb.) Roem. & Schult.	Gentianaceae	1	1	0.02	0.076
Capparis erythrocarpos Isert	Capparaceae	1	1	0.02	0.076
Capparis fascicularis DC.	Capparaceae	1	1	0.02	0.076
Capsicum chinense Jacq.	Solanaceae	1	1	0.02	0.076
Caralluma adscendens (Roxb.) Haw.	Apocynaceae	1	1	0.02	0.076
Cassia surattensis Burm.f.	Fabaceae	1	1	0.02	0.076
Cassytha filiformis L.	Lauraceae	1	1	0.02	0.076
Centaurea praecox Oliv. & Hiern	Asteraceae	1	1	0.02	0.076
Centella asiatica (L.) Urb.	Apiaceae	1	1	0.02	0.076
Centrostachys aquatica (R.Br.) Wall.	Amaranthaceae	1	1	0.02	0.076
Ceropegia rhynchantha Schltr.	Apocynaceae	1	1	0.02	0.076
Chamaecrista pratensis (R.Vig.) Du Puy	Fabaceae	1	1	0.02	0.076
Chasmanthera dependens Hochst.	Menispermaceae	1	1	0.02	0.076
Chloris barbata Sw.	Poaceae	1	1	0.02	0.076
Chloris pilosa Schumach.	Poaceae	1	1	0.02	0.076
Chlorophytum blepharophyllum Schweinf. ex Baker	Asparagaceae	1	1	0.02	0.076
Chrozophora plicata (Vahl) A.Juss. ex Spreng.	Euphorbiaceae	1	1	0.02	0.076
Cissampelos mucronata A.Rich.	Menispermaceae	1	1	0.02	0.076
Cissus cornifolia (Baker) Planch.	Vitaceae	1	1	0.02	0.076
Cissus diffusiflora (Baker) Planch.	Vitaceae	1	1	0.02	0.076
Cissus rufescens Guill. & Perr.	Vitaceae	1	1	0.02	0.076
Cleistopholis patens (Benth.) Engl. & Diels	Annonaceae	1	1	0.02	0.076
Clerodendrum capitatum (Willd.) Schumach.	Lamiaceae	1	1	0.02	0.076
Codiaeum variegatum (L.) A.Juss.	Euphorbiaceae	1	1	0.02	0.076
Cola gigantea A.Chev.	Malvaceae	1	1	0.02	0.076
Combretum indicum (L.) Jongkind	Combretaceae	1	1	0.02	0.076
Commelina erecta L.	Commelinaceae	1	1	0.02	0.076
Corchorus aestuans L.	Malvaceae	1	1	0.02	0.076
Corchorus trilocularis L.	Malvaceae	1	1	0.02	0.076
Cordia sebestena L.	Boraginaceae	1	1	0.02	0.076
Cremaspora triflora (Thonn.) K.Schum.	Rubiaceae	1	1	0.02	0.076
Crinum distichum Herb.	Amaryllidaceae	1	1	0.02	0.076
Crinum ornatum (L.f. ex Aiton) Bury	Amaryllidaceae	1	1	0.02	0.076
Crotalaria barkae Schweinf.	Fabaceae	1	1	0.02	0.076
Crotalaria glauca Willd.	Fabaceae	1	1	0.02	0.076
Crotalaria goreensis Guill. & Perr.	Fabaceae	1	1	0.02	0.076
Crotalaria macrocalyx Benth.	Fabaceae	1	1	0.02	0.076
Crotalaria ochroleuca G.Don	Fabaceae	1	1	0.02	0.076
Crotalaria podocarpa DC.	Fabaceae	1	1	0.02	0.076
Croton gratissimus Burch.	Euphorbiaceae	1	1	0.02	0.076
Cryptolepis oblongifolia (Meisn.) Schltr.	Apocynaceae	1	1	0.02	0.076
Cryptostegia grandiflora R.Br. ex Lindl.	Apocynaceae	1	1	0.02	0.076
Ctenium villosum Berhaut	Poaceae	1	1	0.02	0.076
Cucumis maderaspatanus L.	Cucurbitaceae	1	1	0.02	0.076
Cucumis sativus L.	Cucurbitaceae	1	1	0.02	0.076
Cyanotis lanata Benth.	Commelinaceae	1	1	0.02	0.076
Cyathula achyranthoides (Kunth) Moq.	Amaranthaceae	1	1	0.02	0.076
Cyathula prostrata (L.) Blume	Amaranthaceae	1	1	0.02	0.076
Cycas revoluta Thunb.	Cycadaceae	1	1	0.02	0.076
Cyperus alopecuroides Rottb.	Cyperaceae	1	1	0.02	0.076
Cyperus amabilis Vahl	Cyperaceae	1	1	0.02	0.076
Cyperus digitatus Roxb.	Cyperaceae	1	1	0.02	0.076
Cyperus maculatus Boeckeler	Cyperaceae	1	1	0.02	0.076
Cyperus reduncus Hochst. ex Boeckeler	Cyperaceae	1	1	0.02	0.076
Cyperus sphacelatus Rottb.	Cyperaceae	1	1	0.02	0.076
Cyphostemma flavicans (Baker) Desc.	Vitaceae	1	1	0.02	0.076
Cyphostemma waterlotii (A.Chev.) Desc.	Vitaceae	1	1	0.02	0.076
Datura inoxia Mill.	Solanaceae	1	1	0.02	0.076
Delonix regia (Bojer ex Hook.) Raf.	Fabaceae	1	1	0.02	0.076
Desmodium salicifolium (Poir.) DC.	Fabaceae	1	1	0.02	0.076
Digitaria argillacea (Hitchc. & Chase) Fernald	Poaceae	1	1	0.02	0.076
Dioscorea abyssinica Hochst. ex Kunth	Dioscoreaceae	1	1	0.02	0.076
Dioscorea alata L.	Dioscoreaceae	1	1	0.02	0.076
Diospyros ferrea (Willd.) Bakh.	Ebenaceae	1	1	0.02	0.076
Duranta erecta L.	Verbenaceae	1	1	0.02	0.076
Echinops longifolius A.Rich.	Asteraceae	1	1	0.02	0.076
Eichhornia crassipes (Mart.) Solms	Pontederiaceae	1	1	0.02	0.076
Eleocharis acutangula (Roxb.) Schult.	Cyperaceae	1	1	0.02	0.076
Elymandra androphila (Stapf) Stapf	Poaceae	1	1	0.02	0.076
Elytrophorus spicatus (Willd.) A.Camus	Poaceae	1	1	0.02	0.076
Embelia guineensis Baker	Primulaceae	1	1	0.02	0.076
Englerina lecardii (Engl.) Balle	Loranthaceae	1	1	0.02	0.076
Enteropogon prieurii (Kunth) Clayton	Poaceae	1	1	0.02	0.076
Eragrostis aegyptiaca (Willd.) Delile	Poaceae	1	1	0.02	0.076
Eragrostis amabilis (L.) Wight & Arn.	Poaceae	1	1	0.02	0.076
Eragrostis atrovirens (Desf.) Trin. ex Steud.	Poaceae	1	1	0.02	0.076
Eragrostis elegantissima Chiov.	Poaceae	1	1	0.02	0.076
Eragrostis turgida (Schumach.) De Wild.	Poaceae	1	1	0.02	0.076
Eriosema afzelii Baker	Fabaceae	1	1	0.02	0.076
Eriosema griseum Baker	Fabaceae	1	1	0.02	0.076
Eucalyptus torreliana F.Muell.	Myrtaceae	1	1	0.02	0.076
Euclasta condylotricha (Hochst. ex Steud.) Stapf	Poaceae	1	1	0.02	0.076
Eulophia guineensis Lindl.	Orchidaceae	1	1	0.02	0.076
Euphorbia cotinifolia L.	Euphorbiaceae	1	1	0.02	0.076
Euphorbia forskalii J.Gay	Euphorbiaceae	1	1	0.02	0.076
Euphorbia heterophylla L.	Euphorbiaceae	1	1	0.02	0.076
Euphorbia hyssopifolia L.	Euphorbiaceae	1	1	0.02	0.076
Euphorbia paganorum A.Chev.	Euphorbiaceae	1	1	0.02	0.076
Euphorbia polycnemoides Hochst. ex Boiss.	Euphorbiaceae	1	1	0.02	0.076
Euphorbia prostrata Aiton	Euphorbiaceae	1	1	0.02	0.076
Euphorbia scordifolia Jacq.	Euphorbiaceae	1	1	0.02	0.076
Euphorbia thymifolia L.	Euphorbiaceae	1	1	0.02	0.076
Euploca ovalifolia (Forssk.) Diane & Hilger	Boraginaceae	1	1	0.02	0.076
Euploca strigosa (Willd.) Diane & Hilger	Boraginaceae	1	1	0.02	0.076
Fadogia erythrophloea (K.Schum. & K.Krause) Hutch. & Dalziel	Rubiaceae	1	1	0.02	0.076
Flabellaria paniculata Cav.	Malpighiaceae	1	1	0.02	0.076
Fuirena umbellata Rottb.	Cyperaceae	1	1	0.02	0.076
Garcinia livingstonei T.Anderson	Clusiaceae	1	1	0.02	0.076
Gardenia imperialis K.Schum.	Rubiaceae	1	1	0.02	0.076
Gisekia pharnaceoides L.	Gisekiaceae	1	1	0.02	0.076
Gladiolus gregarius Welw. ex Baker	Iridaceae	1	1	0.02	0.076
Glinus lotoides L.	Molluginaceae	1	1	0.02	0.076
Gnidia kraussiana Meisn.	Thymelaeaceae	1	1	0.02	0.076
Gomphrena celosioides Mart.	Amaranthaceae	1	1	0.02	0.076
Gongronema latifolium Benth.	Apocynaceae	1	1	0.02	0.076
Gossypium hirsutum L.	Malvaceae	1	1	0.02	0.076
Grangea maderaspatana (L.) Desf.	Asteraceae	1	1	0.02	0.076
Habenaria procera (Sw. ex Pers.) Lindl.	Orchidaceae	1	1	0.02	0.076
Hackelochloa granularis (L.) Kuntze	Poaceae	1	1	0.02	0.076
Heliotropium bacciferum Forssk.	Boraginaceae	1	1	0.02	0.076
Heliotropium crispum Desf.	Boraginaceae	1	1	0.02	0.076
Heteropogon melanocarpus (Elliott) Benth.	Poaceae	1	1	0.02	0.076
Hibiscus rosa-sinensis L.	Malvaceae	1	1	0.02	0.076
Hybanthus enneaspermus (L.) F.Muell.	Violaceae	1	1	0.02	0.076
Hygrophila senegalensis (Nees) T.Anderson	Acanthaceae	1	1	0.02	0.076
Hymenocardia heudelotii Müll.Arg.	Phyllanthaceae	1	1	0.02	0.076
Hyparrhenia barteri (Hack.) Stapf	Poaceae	1	1	0.02	0.076
Hyparrhenia glabriuscula (Hochst. ex A.Rich.) Stapf	Poaceae	1	1	0.02	0.076
Hyparrhenia rudis Stapf	Poaceae	1	1	0.02	0.076
Hyparrhenia smithiana (Hook.f.) Stapf	Poaceae	1	1	0.02	0.076
Hyparrhenia subplumosa Stapf	Poaceae	1	1	0.02	0.076
Hyparrhenia welwitschii (Rendle) Stapf	Poaceae	1	1	0.02	0.076
Hypoestes aristata (Vahl) Sol. ex Roem. & Schult.	Acanthaceae	1	1	0.02	0.076
Hyptis lanceolata Poir.	Lamiaceae	1	1	0.02	0.076
Indigofera colutea (Burm.f.) Merr.	Fabaceae	1	1	0.02	0.076
Indigofera congesta Welw. ex Baker	Fabaceae	1	1	0.02	0.076
Indigofera conjugata Baker	Fabaceae	1	1	0.02	0.076
Indigofera fulvopilosa Brenan	Fabaceae	1	1	0.02	0.076
Indigofera geminata Baker	Fabaceae	1	1	0.02	0.076
Indigofera macrophylla Schumach. & Thonn.	Fabaceae	1	1	0.02	0.076
Indigofera nummulariifolia (L.) Livera ex Alston	Fabaceae	1	1	0.02	0.076
Indigofera pilosa Poir.	Fabaceae	1	1	0.02	0.076
Indigofera secundiflora Poir.	Fabaceae	1	1	0.02	0.076
Indigofera senegalensis Lam.	Fabaceae	1	1	0.02	0.076
Indigofera spicata Forssk.	Fabaceae	1	1	0.02	0.076
Ipomoea carnea Jacq.	Convolvulaceae	1	1	0.02	0.076
Ipomoea chrysochaetia Hallier.f.	Convolvulaceae	1	1	0.02	0.076
Ipomoea coscinosperma Hochst. ex Choisy	Convolvulaceae	1	1	0.02	0.076
Ipomoea dichroa Choisy	Convolvulaceae	1	1	0.02	0.076
Ipomoea involucrata P.Beauv.	Convolvulaceae	1	1	0.02	0.076
Ipomoea mauritiana Jacq.	Convolvulaceae	1	1	0.02	0.076
Ipomoea setifera Poir.	Convolvulaceae	1	1	0.02	0.076
Ipomoea turbinata Lag.	Convolvulaceae	1	1	0.02	0.076
Ipomoea vagans Baker	Convolvulaceae	1	1	0.02	0.076
Ischaemum amethystinum J.-P.Lebrun	Poaceae	1	1	0.02	0.076
Ixora javanica (Blume) DC.	Rubiaceae	1	1	0.02	0.076
Jasminum obtusifolium Baker	Oleaceae	1	1	0.02	0.076
Jatropha integerrima Jacq.	Euphorbiaceae	1	1	0.02	0.076
Justicia ladanoides Lam.	Acanthaceae	1	1	0.02	0.076
Keetia cornelia (Cham. & Schltdl.) Bridson	Rubiaceae	1	1	0.02	0.076
Khaya grandifoliola C.DC.	Meliaceae	1	1	0.02	0.076
Kohautia grandiflora DC.	Rubiaceae	1	1	0.02	0.076
Kyllinga odorata Vahl	Cyperaceae	1	1	0.02	0.076
Kyllinga pumila Michx.	Cyperaceae	1	1	0.02	0.076
Lablab purpureus (L.) Sweet.	Fabaceae	1	1	0.02	0.076
Lactuca inermis Forssk.	Asteraceae	1	1	0.02	0.076
Lagenaria breviflora (Benth.) Roberty	Cucurbitaceae	1	1	0.02	0.076
Lagerstroemia indica L.	Lythraceae	1	1	0.02	0.076
Launaea taraxacifolia (Willd.) Amin ex C.Jeffrey	Asteraceae	1	1	0.02	0.076
Leersia hexandra Sw.	Poaceae	1	1	0.02	0.076
Lepidagathis heudelotiana Nees	Acanthaceae	1	1	0.02	0.076
Leptochloa coerulescens Steud.	Poaceae	1	1	0.02	0.076
Limeum viscosum (J.Gay) Fenzl	Limeaceae	1	1	0.02	0.076
Loudetia arundinacea (A.Rich.) Steud.	Poaceae	1	1	0.02	0.076
Loudetia hordeiformis (Stapf) C.E.Hubb.	Poaceae	1	1	0.02	0.076
Loudetia phragmitoides (Peter) C.E.Hubb.	Poaceae	1	1	0.02	0.076
Ludwigia octovalvis (Jacq.) P.H.Raven	Onagraceae	1	1	0.02	0.076
Macrotyloma geocarpum (Harms) Maréchal & Baudet	Fabaceae	1	1	0.02	0.076
Mallotus oppositifolius (Geiseler) Müll.Arg.	Euphorbiaceae	1	1	0.02	0.076
Marsilea minuta L.	Marsileaceae	1	1	0.02	0.076
Melanthera gambica Hutch. & Dalziel	Asteraceae	1	1	0.02	0.076
Melanthera rhombifolia O.Hoffm. & Muschl.	Asteraceae	1	1	0.02	0.076
Melliniella micrantha Harms	Fabaceae	1	1	0.02	0.076
Melochia corchorifolia L.	Malvaceae	1	1	0.02	0.076
Merremia dissecta (Jacq.) Hallier f.	Convolvulaceae	1	1	0.02	0.076
Merremia pinnata (Hochst. ex Choisy) Hallier f.	Convolvulaceae	1	1	0.02	0.076
Merremia tridentata (L.) Hallier f.	Convolvulaceae	1	1	0.02	0.076
Merremia umbellata (L.) Hallier f.	Convolvulaceae	1	1	0.02	0.076
Microchloa indica (L.f.) P.Beauv.	Poaceae	1	1	0.02	0.076
Milicia excelsa (Welw.) C.C.Berg	Moraceae	1	1	0.02	0.076
Mirabilis jalapa L.	Nyctaginaceae	1	1	0.02	0.076
Momordica charantia L.	Cucurbitaceae	1	1	0.02	0.076
Mucuna poggei Taub.	Fabaceae	1	1	0.02	0.076
Neorautanenia mitis (A.Rich.) Verdc.	Fabaceae	1	1	0.02	0.076
Nervilia adolphi Schltr.	Orchidaceae	1	1	0.02	0.076
Nervilia bicarinata (Blume) Schltr.	Orchidaceae	1	1	0.02	0.076
Nesphostylis holosericea (Baker) Verdc.	Fabaceae	1	1	0.02	0.076
Nicotiana rustica L.	Solanaceae	1	1	0.02	0.076
Nymphaea micrantha Guill. & Perr.	Nymphaeaceae	1	1	0.02	0.076
Oldenlandia affinis (Roem. & Schult.) DC.	Rubiaceae	1	1	0.02	0.076
Olyra latifolia L.	Poaceae	1	1	0.02	0.076
Orbea decaisneana (Lehm.) Bruyns	Apocynaceae	1	1	0.02	0.076
Osbeckia tubulosa Sm.	Melastomataceae	1	1	0.02	0.076
Pancratium trianthum Herb.	Amaryllidaceae	1	1	0.02	0.076
Pandiaka involucrata (Moq.) B.D.Jacks.	Amaranthaceae	1	1	0.02	0.076
Panicum afzelii Sw.	Poaceae	1	1	0.02	0.076
Panicum maximum Jacq.	Poaceae	1	1	0.02	0.076
Panicum nigerense Hitchc.	Poaceae	1	1	0.02	0.076
Paspalidium geminatum (Forssk.) Stapf	Poaceae	1	1	0.02	0.076
Passiflora edulis Sims	Passifloraceae	1	1	0.02	0.076
Pavetta oblongifolia (Hiern) Bremek.	Rubiaceae	1	1	0.02	0.076
Pavonia triloba Guill. & Perr.	Malvaceae	1	1	0.02	0.076
Peltophorum pterocarpum (DC.) K.Heyne	Fabaceae	1	1	0.02	0.076
Pennisetum setigerum (Vahl) Wipff	Poaceae	1	1	0.02	0.076
Persicaria senegalensis (Meisn.) Soják	Polygonaceae	1	1	0.02	0.076
Phaulopsis ciliata (Willd.) Hepper	Acanthaceae	1	1	0.02	0.076
Phyllanthus amarus Schumach. & Thonn.	Phyllanthaceae	1	1	0.02	0.076
Phyllanthus beillei Hutch.	Phyllanthaceae	1	1	0.02	0.076
Phyllanthus maderaspatensis L.	Phyllanthaceae	1	1	0.02	0.076
Phyllanthus pentandrus Schumach. & Thonn.	Phyllanthaceae	1	1	0.02	0.076
Physalis angulata L.	Solanaceae	1	1	0.02	0.076
Pistia stratiotes L.	Araceae	1	1	0.02	0.076
Pithecellobium dulce (Roxb.) Benth.	Fabaceae	1	1	0.02	0.076
Polycarpaea eriantha Hochst. ex A.Rich.	Caryophyllaceae	1	1	0.02	0.076
Polycarpon prostratum (Forssk.) Asch. & Schweinf.	Caryophyllaceae	1	1	0.02	0.076
Polygala multiflora Poir.	Polygalaceae	1	1	0.02	0.076
Portulaca foliosa Ker Gawl.	Portulacaceae	1	1	0.02	0.076
Pouchetia africana A.Rich. ex DC.	Rubiaceae	1	1	0.02	0.076
Prosopis juliflora (Sw.) DC.	Fabaceae	1	1	0.02	0.076
Pseudarthria fagifolia Baker	Fabaceae	1	1	0.02	0.076
Pseudarthria hookeri Wight & Arn.	Fabaceae	1	1	0.02	0.076
Pseudoconyza viscosa (Mill.) D'Arcy	Asteraceae	1	1	0.02	0.076
Psorospermum corymbiferum Hochr.	Hypericaceae	1	1	0.02	0.076
Psorospermum febrifugum Spach	Hypericaceae	1	1	0.02	0.076
Psorospermum senegalense Spach	Hypericaceae	1	1	0.02	0.076
Psychotria vogeliana Benth.	Rubiaceae	1	1	0.02	0.076
Pulicaria undulata (L.) C.A.Mey.	Asteraceae	1	1	0.02	0.076
Punica granatum L.	Lythraceae	1	1	0.02	0.076
Raphionacme splendens Schlechter	Apocynaceae	1	1	0.02	0.076
Requienia obcordata (Lam. ex Poir.) DC.	Fabaceae	1	1	0.02	0.076
Rhynchosia minima (L.) DC.	Fabaceae	1	1	0.02	0.076
Rhynchosia sublobata (Schumach. & Thonn.) Meikle	Fabaceae	1	1	0.02	0.076
Rhynchospora corymbosa (L.) Britton	Cyperaceae	1	1	0.02	0.076
Rhytachne rottboellioides Desv.	Poaceae	1	1	0.02	0.076
Ritchiea capparoides (Andrews) Britten	Capparaceae	1	1	0.02	0.076
Rotula aquatica Lour.	Boraginaceae	1	1	0.02	0.076
Rutidea parviflora DC.	Rubiaceae	1	1	0.02	0.076
Sacciolepis micrococca Mez	Poaceae	1	1	0.02	0.076
Sarcostemma viminale (L.) R.Br.	Apocynaceae	1	1	0.02	0.076
Scadoxus multiflorus (Martyn) Raf.	Amaryllidaceae	1	1	0.02	0.076
Schizachyrium brevifolium (Sw.) Nees ex Büse	Poaceae	1	1	0.02	0.076
Schizachyrium nodulosum (Hack.) Stapf	Poaceae	1	1	0.02	0.076
Schizachyrium ruderale Clayton	Poaceae	1	1	0.02	0.076
Schizachyrium rupestre (K.Schum.) Stapf	Poaceae	1	1	0.02	0.076
Schizachyrium schweinfurthii (Hack.) Stapf	Poaceae	1	1	0.02	0.076
Schoenoplectiella senegalensis (Hochst. ex Steud.) Lye	Cyperaceae	1	1	0.02	0.076
Scleria racemosa Poir.	Cyperaceae	1	1	0.02	0.076
Sclerocarpus africanus Jacq. ex Murray	Asteraceae	1	1	0.02	0.076
Sebastiania chamaelea (L.) Müll.Arg.	Euphorbiaceae	1	1	0.02	0.076
Secamone afzelii (Schult.) K.Schum.	Apocynaceae	1	1	0.02	0.076
Sericanthe chevalieri (K.Krause) Robbr.	Rubiaceae	1	1	0.02	0.076
Sesbania rostrata Bremek. & Oberm.	Fabaceae	1	1	0.02	0.076
Sida alba L.	Malvaceae	1	1	0.02	0.076
Sida ovata Forssk.	Malvaceae	1	1	0.02	0.076
Sida rhombifolia L.	Malvaceae	1	1	0.02	0.076
Sida urens L.	Malvaceae	1	1	0.02	0.076
Solanum melongena L.	Solanaceae	1	1	0.02	0.076
Solanum tuberosum L.	Solanaceae	1	1	0.02	0.076
Solenostemon rotundifolius (Poir.) J.K.Morton	Lamiaceae	1	1	0.02	0.076
Sonchus oleraceus L.	Asteraceae	1	1	0.02	0.076
Sorghastrum bipennatum (Hack.) Pilg.	Poaceae	1	1	0.02	0.076
Sorindeia juglandifolia (A.Rich.) Planch. ex Oliv.	Anacardiaceae	1	1	0.02	0.076
Spermacoce chaetocephala DC.	Rubiaceae	1	1	0.02	0.076
Spermacoce radiata (DC.) Hiern	Rubiaceae	1	1	0.02	0.076
Spermacoce ruelliae DC.	Rubiaceae	1	1	0.02	0.076
Spermacoce stachydea DC.	Rubiaceae	1	1	0.02	0.076
Spermacoce verticillata L.	Rubiaceae	1	1	0.02	0.076
Sphenostylis stenocarpa (Hochst. ex A.Rich.) Harms	Fabaceae	1	1	0.02	0.076
Sporobolus helvolus (Trin.) T.Durand & Schinz	Poaceae	1	1	0.02	0.076
Sporobolus microprotus Stapf	Poaceae	1	1	0.02	0.076
Steganotaenia araliacea Hochst.	Apiaceae	1	1	0.02	0.076
Sterculia tragacantha Lindl.	Malvaceae	1	1	0.02	0.076
Struchium sparganophorum (L.) Kuntze	Asteraceae	1	1	0.02	0.076
Stylochaeton lancifolius Kotschy & Peyr.	Araceae	1	1	0.02	0.076
Stylosanthes guianensis (Aubl.) Sw.	Fabaceae	1	1	0.02	0.076
Synedrella nodiflora Gaertn.	Asteraceae	1	1	0.02	0.076
Tecoma stans (L.) Juss. ex Kunth	Bignoniaceae	1	1	0.02	0.076
Tephrosia platycarpa Guill. & Perr.	Fabaceae	1	1	0.02	0.076
Tephrosia villosa (L.) Pers.	Fabaceae	1	1	0.02	0.076
Terminalia albida Scott-Elliot	Combretaceae	1	1	0.02	0.076
Terminalia mantaly H.Perrier	Combretaceae	1	1	0.02	0.076
Tetracera potatoria Afzel. ex G.Don	Dilleniaceae	1	1	0.02	0.076
Tetrapogon cenchriformis (A.Rich.) Clayton	Poaceae	1	1	0.02	0.076
Thalia geniculata L.	Marantaceae	1	1	0.02	0.076
Thaumatococcus daniellii (Bennet) Benth.	Marantaceae	1	1	0.02	0.076
Thelepogon elegans Roth	Poaceae	1	1	0.02	0.076
Thesium viride A.W.Hill	Santalaceae	1	1	0.02	0.076
Thespesia populneoides (Roxb.) Kostel.	Malvaceae	1	1	0.02	0.076
Tinospora bakis (A.Rich.) Miers	Menispermaceae	1	1	0.02	0.076
Tragia vogelii Keay	Euphorbiaceae	1	1	0.02	0.076
Tragus berteronianus Schult.	Poaceae	1	1	0.02	0.076
Tragus racemosus (L.) All.	Poaceae	1	1	0.02	0.076
Tribulus terrestris L.	Zygophyllaceae	1	1	0.02	0.076
Trichoneura mollis (Kunth) Ekman	Poaceae	1	1	0.02	0.076
Tripogon minimus (A.Rich.) Steud.	Poaceae	1	1	0.02	0.076
Tristachya superba (De Not.) Schweinf. & Asch.	Poaceae	1	1	0.02	0.076
Triumfetta rhomboidea Jacq.	Malvaceae	1	1	0.02	0.076
Tylophora oblonga N.E.Br.	Apocynaceae	1	1	0.02	0.076
Tylophora oculata N.E.Br.	Apocynaceae	1	1	0.02	0.076
Typha domingensis Pers.	Typhaceae	1	1	0.02	0.076
Uapaca heudelotii Baill.	Phyllanthaceae	1	1	0.02	0.076
Urelytrum muricatum C.E.Hubb.	Poaceae	1	1	0.02	0.076
Usteria guineensis Willd.	Loganiaceae	1	1	0.02	0.076
Vernonia adoensis Sch.Bip. ex Walp.	Asteraceae	1	1	0.02	0.076
Vernonia amygdalina Delile	Asteraceae	1	1	0.02	0.076
Vernonia galamensis (Cass.) Less.	Asteraceae	1	1	0.02	0.076
Vernonia perrottetii Sch.Bip. ex Walp.	Asteraceae	1	1	0.02	0.076
Vigna gracilis (Guill. & Perr.) Hook.f.	Fabaceae	1	1	0.02	0.076
Vigna racemosa (G.Don) Hutch. & Dalziel	Fabaceae	1	1	0.02	0.076
Vigna radiata (L.) R.Wilczek	Fabaceae	1	1	0.02	0.076
Vigna reticulata Hook.f.	Fabaceae	1	1	0.02	0.076
Wahlenbergia perrottetii (A.DC.) Thulin	Campanulaceae	1	1	0.02	0.076
Zanthoxylum leprieurii Guill. & Perr.	Rutaceae	1	1	0.02	0.076
Zoysia matrella (L.) Merr.	Poaceae	1	1	0.02	0.076
Drosera indica L.	Droseraceae	1	1	0.02	0.076
[truncated: 15 more columns]
