# Supplementary material for: Traditional plant use in Burkina Faso (West Africa): a national-scale analysis with focus on traditional medicine
Source: J Ethnobiol Ethnomed. 2015 Feb 19;11:9. doi: 10.1186/1746-4269-11-9 (PMC4429461; doi:10.1186/1746-4269-11-9)
Supplement: Supplementary file 5 — Additional file 5: Usefulness ranking in traditional medicine of all species with at least one documented use. (XLSX 56 KB) [file 13002_2014_473_MOESM5_ESM.xlsx]

## Sheet: Sheet1
Accepted_Name	Family	Number medicinal of uses	Frequency of citation	Relative frequency of citation	Relative importance index
Tamarindus indica L.	Fabaceae	18	21	0.53	0.974
Vitellaria paradoxa C.F.Gaertn.	Sapotaceae	17	19	0.48	0.9
Adansonia digitata L.	Malvaceae	19	16	0.4	0.881
Ximenia americana L.	Ximeniaceae	18	17	0.43	0.878
Khaya senegalensis (Desr.) A.Juss.	Meliaceae	16	19	0.48	0.873
Diospyros mespiliformis Hochst. ex A.DC.	Ebenaceae	16	18	0.45	0.85
Lannea microcarpa Engl. & K.Krause	Anacardiaceae	16	18	0.45	0.85
Annona senegalensis Pers.	Annonaceae	18	15	0.38	0.831
Ficus sycomorus L.	Moraceae	16	17	0.43	0.826
Combretum micranthum G.Don	Combretaceae	18	14	0.35	0.807
Sterculia setigera Delile	Malvaceae	17	15	0.38	0.805
Balanites aegyptiaca (L.) Delile	Zygophyllaceae	16	16	0.4	0.802
Lannea acida A.Rich.	Anacardiaceae	17	14	0.35	0.781
Guiera senegalensis J.F.Gmel.	Combretaceae	16	15	0.38	0.778
Pterocarpus erinaceus Poir.	Fabaceae	16	15	0.38	0.778
Parkia biglobosa (Jacq.) R.Br. ex G.Don	Fabaceae	15	16	0.4	0.776
Sarcocephalus latifolius (Sm.) E.A.Bruce	Rubiaceae	15	16	0.4	0.776
Cassia sieberiana DC.	Fabaceae	14	17	0.43	0.773
Entada africana Guill. & Perr.	Fabaceae	18	12	0.3	0.759
Sclerocarya birrea (A.Rich.) Hochst.	Anacardiaceae	16	13	0.33	0.731
Mitragyna inermis (Willd.) Kuntze	Rubiaceae	15	14	0.35	0.728
Securidaca longipedunculata Fresen.	Polygalaceae	15	14	0.35	0.728
Anogeissus leiocarpa (DC.) Guill. & Perr.	Combretaceae	12	17	0.43	0.721
Calotropis procera (Aiton) R.Br.	Apocynaceae	17	10	0.25	0.685
Detarium microcarpum Guill. & Perr.	Fabaceae	14	13	0.33	0.678
Bombax costatum Pellegr. & Vuill.	Malvaceae	16	10	0.25	0.659
Trichilia emetica Vahl	Meliaceae	15	11	0.28	0.657
Terminalia avicennioides Guill. & Perr.	Combretaceae	14	12	0.3	0.654
Faidherbia albida (Delile) A.Chev.	Fabaceae	12	14	0.35	0.649
Ceiba pentandra (L.) Gaertn.	Malvaceae	16	9	0.23	0.635
Gymnosporia senegalensis (Lam.) Loes.	Celastraceae	13	12	0.3	0.628
Piliostigma reticulatum (DC.) Hochst.	Fabaceae	12	13	0.33	0.625
Mangifera indica L.	Anacardiaceae	16	8	0.2	0.612
Crossopteryx febrifuga (Afzel. ex G.Don) Benth.	Rubiaceae	14	10	0.25	0.607
Feretia apodanthera Delile	Rubiaceae	14	10	0.25	0.607
Leptadenia hastata (Pers.) Decne.	Apocynaceae	14	10	0.25	0.607
Strychnos spinosa Lam.	Loganiaceae	14	10	0.25	0.607
Acacia seyal Delile	Fabaceae	12	12	0.3	0.602
Acacia nilotica (L.) Willd. ex Delile	Fabaceae	11	13	0.33	0.599
Daniellia oliveri (Rolfe) Hutch. & Dalziel	Fabaceae	11	13	0.33	0.599
Piliostigma thonningii (Schumach.) Milne-Redh.	Fabaceae	11	13	0.33	0.599
Ficus thonningii Blume	Moraceae	16	7	0.18	0.588
Lannea velutina A.Rich.	Anacardiaceae	14	9	0.23	0.583
Pteleopsis suberosa Engl. & Diels	Combretaceae	14	9	0.23	0.583
Ziziphus mauritiana Lam.	Rhamnaceae	14	9	0.23	0.583
Saba senegalensis (A.DC.) Pichon	Apocynaceae	12	11	0.28	0.578
Dichrostachys cinerea (L.) Wight & Arn.	Fabaceae	15	7	0.18	0.561
Terminalia macroptera Guill. & Perr.	Combretaceae	14	8	0.2	0.559
Waltheria indica L.	Malvaceae	14	8	0.2	0.559
Afzelia africana Sm. ex Pers.	Fabaceae	13	9	0.23	0.556
Azadirachta indica A.Juss.	Meliaceae	12	10	0.25	0.554
Combretum glutinosum Perr. ex DC.	Combretaceae	10	12	0.3	0.549
Vitex doniana Sweet	Lamiaceae	9	13	0.33	0.546
Euphorbia hirta L.	Euphorbiaceae	17	4	0.1	0.543
Paullinia pinnata L.	Sapindaceae	16	5	0.13	0.54
Flueggea virosa (Roxb. ex Willd.) Voigt	Phyllanthaceae	15	6	0.15	0.538
Acacia sieberiana DC.	Fabaceae	14	7	0.18	0.535
Ficus sur Forssk.	Moraceae	13	8	0.2	0.533
Parinari curatellifolia Planch. ex Benth.	Chrysobalanaceae	13	8	0.2	0.533
Acacia macrostachya Rchb. ex DC.	Fabaceae	12	9	0.23	0.53
Ficus platyphylla Delile	Moraceae	11	10	0.25	0.528
Hymenocardia acida Tul.	Phyllanthaceae	15	5	0.13	0.514
Boswellia dalzielii Hutch.	Burseraceae	13	7	0.18	0.509
Capparis sepiaria L.	Capparaceae	13	7	0.18	0.509
Cochlospermum tinctorium Perr. ex A.Rich.	Bixaceae	13	7	0.18	0.509
Cassia occidentalis L.	Fabaceae	12	8	0.2	0.506
Gardenia erubescens Stapf & Hutch.	Rubiaceae	11	9	0.23	0.504
Bauhinia rufescens Lam.	Fabaceae	10	10	0.25	0.501
Prosopis africana (Guill. & Perr.) Taub.	Fabaceae	9	11	0.28	0.499
Jatropha curcas L.	Euphorbiaceae	14	5	0.13	0.487
Pavetta crassipes K.Schum.	Rubiaceae	12	7	0.18	0.482
Ageratum conyzoides L.	Asteraceae	16	2	0.05	0.469
Abrus precatorius L.	Fabaceae	15	3	0.08	0.466
Stylosanthes erecta P.Beauv.	Fabaceae	15	3	0.08	0.466
Combretum molle R.Br. ex G.Don	Combretaceae	13	5	0.13	0.461
Hyptis spicigera Lam.	Lamiaceae	13	5	0.13	0.461
Cassia alata L.	Fabaceae	12	6	0.15	0.459
Combretum paniculatum Vent.	Combretaceae	12	6	0.15	0.459
Acacia dudgeonii Craib ex Holland	Fabaceae	11	7	0.18	0.456
Vernonia colorata (Willd.) Drake	Asteraceae	10	8	0.2	0.454
Pseudocedrela kotschyi (Schweinf.) Harms	Meliaceae	9	9	0.23	0.451
Sesamum indicum L.	Pedaliaceae	15	2	0.05	0.442
Blighia sapida K.D.Koenig	Sapindaceae	14	3	0.08	0.44
Capsicum frutescens L.	Solanaceae	14	3	0.08	0.44
Lippia chevalieri Moldenke	Verbenaceae	14	3	0.08	0.44
Combretum adenogonium Steud. ex A.Rich.	Combretaceae	13	4	0.1	0.437
Boscia senegalensis (Pers.) Lam.	Capparaceae	12	5	0.13	0.435
Fadogia agrestis Schweinf. ex Hiern	Rubiaceae	12	5	0.13	0.435
Stereospermum kunthianum Cham.	Bignoniaceae	12	5	0.13	0.435
Xeroderris stuhlmannii (Taub.) Mendonça & E.C.Sousa	Fabaceae	11	6	0.15	0.432
Pericopsis laxiflora (Benth.) Meeuwen	Fabaceae	10	7	0.18	0.43
Borassus aethiopum Mart.	Arecaceae	9	8	0.2	0.427
Burkea africana Hook.	Fabaceae	9	8	0.2	0.427
Ampelocissus africana (Lour.) Merr.	Vitaceae	14	2	0.05	0.416
Arachis hypogaea L.	Fabaceae	14	2	0.05	0.416
Pupalia lappacea (L.) A.Juss.	Amaranthaceae	14	2	0.05	0.416
Ipomoea asarifolia (Desr.) Roem. & Schult.	Convolvulaceae	13	3	0.08	0.414
Sansevieria senegambica Baker	Asparagaceae	13	3	0.08	0.414
Vigna unguiculata (L.) Walp.	Fabaceae	13	3	0.08	0.414
Maerua angolensis DC.	Capparaceae	12	4	0.1	0.411
Zanthoxylum zanthoxyloides (Lam.) Zepern. & Timler	Rutaceae	12	4	0.1	0.411
Acacia polyacantha Willd.	Fabaceae	11	5	0.13	0.409
Acacia senegal (L.) Willd.	Fabaceae	10	6	0.15	0.406
Moringa oleifera L.	Moringaceae	10	6	0.15	0.406
Opilia amentacea Roxb.	Opiliaceae	10	6	0.15	0.406
Boscia angustifolia A.Rich.	Capparaceae	9	7	0.18	0.404
Chrysanthellum indicum DC.	Asteraceae	9	7	0.18	0.404
Boerhavia diffusa L.	Nyctaginaceae	14	1	0.03	0.392
Hygrophila auriculata (Schumach.) Heine	Acanthaceae	13	2	0.05	0.39
Trianthema portulacastrum L.	Aizoaceae	13	2	0.05	0.39
Acacia tortilis (Forssk.) Hayne	Fabaceae	12	3	0.08	0.387
Ocimum americanum L.	Lamiaceae	12	3	0.08	0.387
Philenoptera laxiflora (Guill. & Perr.) Roberty	Fabaceae	12	3	0.08	0.387
Carissa edulis (Forssk.) Vahl	Apocynaceae	11	4	0.1	0.385
Cymbopogon schoenanthus (L.) Spreng.	Poaceae	11	4	0.1	0.385
Desmodium gangeticum (L.) DC.	Fabaceae	11	4	0.1	0.385
Indigofera tinctoria L.	Fabaceae	11	4	0.1	0.385
Anacardium occidentale L.	Anacardiaceae	10	5	0.13	0.382
Cadaba farinosa Forssk.	Capparaceae	10	5	0.13	0.382
Cissus populnea Guill. & Perr.	Vitaceae	10	5	0.13	0.382
Gardenia ternifolia Schumach. & Thonn.	Rubiaceae	10	5	0.13	0.382
Holarrhena floribunda (G.Don) T.Durand & Schinz	Apocynaceae	10	5	0.13	0.382
Acacia gourmaensis A.Chev.	Fabaceae	9	6	0.15	0.38
Carica papaya L.	Caricaceae	8	7	0.18	0.377
Psidium guajava L.	Myrtaceae	7	8	0.2	0.375
Acacia erythrocalyx Brenan	Fabaceae	13	1	0.03	0.366
Baissea multiflora A.DC.	Apocynaceae	13	1	0.03	0.366
Alternanthera pungens Kunth	Amaranthaceae	12	2	0.05	0.363
Portulaca oleracea L.	Portulacaceae	12	2	0.05	0.363
Shirakiopsis elliptica (Hochst.) Esser	Euphorbiaceae	12	2	0.05	0.363
Capparis tomentosa Lam.	Capparaceae	11	3	0.08	0.361
Euphorbia balsamifera Aiton	Euphorbiaceae	11	3	0.08	0.361
Gardenia sokotensis Hutch.	Rubiaceae	11	3	0.08	0.361
Lepidagathis anobrya Nees	Acanthaceae	11	3	0.08	0.361
Lophira lanceolata Tiegh. ex Keay	Ochnaceae	11	3	0.08	0.361
Phyllanthus muellerianus (Kuntze) Exell	Phyllanthaceae	11	3	0.08	0.361
Strophanthus sarmentosus DC.	Apocynaceae	11	3	0.08	0.361
Uvaria chamae P.Beauv.	Annonaceae	11	3	0.08	0.361
Erythrina senegalensis A.DC.	Fabaceae	10	4	0.1	0.358
Loeseneriella africana (Willd.) N.Hallé	Celastraceae	10	4	0.1	0.358
Acanthospermum hispidum DC.	Asteraceae	9	5	0.13	0.356
Commiphora africana (A.Rich.) Engl.	Burseraceae	9	5	0.13	0.356
Dicoma tomentosa Cass.	Asteraceae	9	5	0.13	0.356
Hexalobus monopetalus (A.Rich.) Engl. & Diels	Annonaceae	9	5	0.13	0.356
Ziziphus mucronata Willd.	Rhamnaceae	9	5	0.13	0.356
Combretum nigricans Lepr. ex Guill. & Perr.	Combretaceae	8	6	0.15	0.353
Isoberlinia doka Craib & Stapf	Fabaceae	8	6	0.15	0.353
Cassia siamea Lam.	Fabaceae	6	8	0.2	0.348
Crinum ornatum (L.f. ex Aiton) Bury	Amaryllidaceae	12	1	0.03	0.34
Solanum nigrum L.	Solanaceae	12	1	0.03	0.34
Allophylus africanus P.Beauv.	Sapindaceae	11	2	0.05	0.337
Cassia obtusifolia L.	Fabaceae	11	2	0.05	0.337
Grewia mollis Juss.	Malvaceae	11	2	0.05	0.337
Heliotropium indicum L.	Boraginaceae	11	2	0.05	0.337
Smilax anceps Willd.	Smilacaceae	11	2	0.05	0.337
Solanum incanum L.	Solanaceae	11	2	0.05	0.337
Voacanga africana Stapf	Apocynaceae	11	2	0.05	0.337
Ceratotheca sesamoides Endl.	Pedaliaceae	10	3	0.08	0.335
Euphorbia poissoni Pax	Euphorbiaceae	10	3	0.08	0.335
Ozoroa obovata (Oliv.) R.Fern. & A.Fern.	Anacardiaceae	10	3	0.08	0.335
Scoparia dulcis L.	Plantaginaceae	10	3	0.08	0.335
Ficus glumosa Delile	Moraceae	9	4	0.1	0.332
Lagenaria siceraria (Molina) Standl.	Cucurbitaceae	9	4	0.1	0.332
Zea mays L.	Poaceae	8	5	0.13	0.33
Maerua crassifolia Forssk.	Capparaceae	7	6	0.15	0.327
Bridelia micrantha (Hochst.) Baill.	Phyllanthaceae	11	1	0.03	0.313
Canarium schweinfurthii Engl.	Burseraceae	11	1	0.03	0.313
Capsicum annuum L.	Solanaceae	11	1	0.03	0.313
Ipomoea batatas (L.) Lam.	Convolvulaceae	11	1	0.03	0.313
Spondias mombin L.	Anacardiaceae	11	1	0.03	0.313
Abelmoschus esculentus (L.) Moench	Malvaceae	10	2	0.05	0.311
Alchornea cordifolia (Schumach. & Thonn.) Müll.Arg.	Euphorbiaceae	10	2	0.05	0.311
Asparagus flagellaris (Kunth) Baker	Asparagaceae	10	2	0.05	0.311
Asystasia gangetica (L.) T.Anderson	Acanthaceae	10	2	0.05	0.311
Cola cordifolia (Cav.) R.Br.	Malvaceae	10	2	0.05	0.311
Corchorus olitorius L.	Malvaceae	10	2	0.05	0.311
Eleusine indica (L.) Gaertn.	Poaceae	10	2	0.05	0.311
Nelsonia canescens (Lam.) Spreng.	Acanthaceae	10	2	0.05	0.311
Ocimum basilicum L.	Lamiaceae	10	2	0.05	0.311
Rauvolfia vomitoria Afzel.	Apocynaceae	10	2	0.05	0.311
Sorghum bicolor (L.) Moench	Poaceae	10	2	0.05	0.311
Vigna subterranea (L.) Verdc.	Fabaceae	10	2	0.05	0.311
Cola nitida (Vent.) Schott & Endl.	Malvaceae	9	3	0.08	0.308
Crotalaria naragutensis Hutch.	Fabaceae	9	3	0.08	0.308
Hibiscus cannabinus L.	Malvaceae	9	3	0.08	0.308
Hibiscus sabdariffa L.	Malvaceae	9	3	0.08	0.308
Hoslundia opposita Vahl	Lamiaceae	9	3	0.08	0.308
Maranthes polyandra (Benth.) Prance	Chrysobalanaceae	9	3	0.08	0.308
Ochna schweinfurthiana F.Hoffm.	Ochnaceae	9	3	0.08	0.308
Vernonia cinerea (L.) Less.	Asteraceae	9	3	0.08	0.308
Cymbopogon caesius (Nees ex Hook. & Arn.) Stapf	Poaceae	8	4	0.1	0.306
Indigofera nigritana Hook.f.	Fabaceae	8	4	0.1	0.306
Jatropha gossypiifolia L.	Euphorbiaceae	8	4	0.1	0.306
Sida acuta Burm.f.	Malvaceae	8	4	0.1	0.306
Terminalia laxiflora Engl. & Diels	Combretaceae	8	4	0.1	0.306
Agelanthus dodoneifolius (DC.) Polhill & Wiens	Loranthaceae	7	5	0.13	0.303
Vitex madiensis Oliv.	Lamiaceae	7	5	0.13	0.303
Eucalyptus camaldulensis Dehnh.	Myrtaceae	4	8	0.2	0.296
Amaranthus spinosus L.	Amaranthaceae	10	1	0.03	0.287
Cajanus cajan (L.) Millsp.	Fabaceae	10	1	0.03	0.287
Celosia trigyna L.	Amaranthaceae	10	1	0.03	0.287
Eclipta prostrata (L.) L.	Asteraceae	10	1	0.03	0.287
Kalanchoe crenata (Andrews) Haw.	Crassulaceae	10	1	0.03	0.287
Luffa cylindrica (L.) M.Roem.	Cucurbitaceae	10	1	0.03	0.287
Margaritaria discoidea (Baill.) G.L.Webster	Phyllanthaceae	10	1	0.03	0.287
Phyllanthus amarus Schumach. & Thonn.	Phyllanthaceae	10	1	0.03	0.287
Achyranthes aspera L.	Amaranthaceae	9	2	0.05	0.284
Amaranthus viridis L.	Amaranthaceae	9	2	0.05	0.284
Commelina diffusa Burm.f.	Commelinaceae	9	2	0.05	0.284
Grewia bicolor Juss.	Malvaceae	9	2	0.05	0.284
Grewia flavescens Juss.	Malvaceae	9	2	0.05	0.284
Lannea barteri (Oliv.) Engl.	Anacardiaceae	9	2	0.05	0.284
Lantana camara L.	Verbenaceae	9	2	0.05	0.284
Oxytenanthera abyssinica (A.Rich.) Munro	Poaceae	9	2	0.05	0.284
Combretum aculeatum Vent.	Combretaceae	8	3	0.08	0.282
Combretum collinum Fresen.	Combretaceae	8	3	0.08	0.282
Leucas martinicensis (Jacq.) R.Br.	Lamiaceae	8	3	0.08	0.282
Mitracarpus hirtus (L.) DC.	Rubiaceae	8	3	0.08	0.282
Cassia nigricans Vahl	Fabaceae	7	4	0.1	0.279
Ficus ingens (Miq.) Miq.	Moraceae	7	4	0.1	0.279
Striga hermonthica (Delile) Benth.	Orobanchaceae	7	4	0.1	0.279
Annona muricata L.	Annonaceae	9	1	0.03	0.261
Argemone mexicana L.	Papaveraceae	9	1	0.03	0.261
Desmodium adscendens (Sw.) DC.	Fabaceae	9	1	0.03	0.261
Entada abyssinica Steud. ex A.Rich.	Fabaceae	9	1	0.03	0.261
Ficus asperifolia Miq.	Moraceae	9	1	0.03	0.261
Mimosa pigra L.	Fabaceae	9	1	0.03	0.261
Physalis angulata L.	Solanaceae	9	1	0.03	0.261
Ricinus communis L.	Euphorbiaceae	9	1	0.03	0.261
Sida cordifolia L.	Malvaceae	9	1	0.03	0.261
Tephrosia purpurea (L.) Pers.	Fabaceae	9	1	0.03	0.261
Tribulus terrestris L.	Zygophyllaceae	9	1	0.03	0.261
Xylopia aethiopica (Dunal) A.Rich.	Annonaceae	9	1	0.03	0.261
Corchorus tridens L.	Malvaceae	8	2	0.05	0.258
Polygala arenaria Willd.	Polygalaceae	8	2	0.05	0.258
Tephrosia bracteolata Guill. & Perr.	Fabaceae	8	2	0.05	0.258
Tinnea barteri Gürke	Lamiaceae	8	2	0.05	0.258
Wissadula rostrata (Schumach.) Hook.f.	Malvaceae	8	2	0.05	0.258
Blepharis linariifolia Pers.	Acanthaceae	7	3	0.08	0.256
Bridelia ferruginea Benth.	Phyllanthaceae	7	3	0.08	0.256
Kigelia africana (Lam.) Benth.	Bignoniaceae	7	3	0.08	0.256
Lawsonia inermis L.	Lythraceae	7	3	0.08	0.256
Dalbergia melanoxylon Guill. & Perr.	Fabaceae	6	4	0.1	0.253
Desmodium velutinum (Willd.) DC.	Fabaceae	6	4	0.1	0.253
Albizia chevalieri Harms	Fabaceae	5	5	0.13	0.251
Nicotiana tabacum L.	Solanaceae	5	5	0.13	0.251
Acacia ataxacantha DC.	Fabaceae	8	1	0.03	0.234
Aspilia africana (Pers.) C.D.Adams	Asteraceae	8	1	0.03	0.234
Boscia salicifolia Oliv.	Capparaceae	8	1	0.03	0.234
Caralluma adscendens (Roxb.) Haw.	Apocynaceae	8	1	0.03	0.234
Cassytha filiformis L.	Lauraceae	8	1	0.03	0.234
Chamaecrista pratensis (R.Vig.) Du Puy	Fabaceae	8	1	0.03	0.234
Cleome viscosa L.	Capparaceae	8	1	0.03	0.234
Cordia myxa L.	Boraginaceae	8	1	0.03	0.234
Cucumis melo L.	Cucurbitaceae	8	1	0.03	0.234
Cyathula prostrata (L.) Blume	Amaranthaceae	8	1	0.03	0.234
Dialium guineense Willd.	Fabaceae	8	1	0.03	0.234
Dicliptera paniculata (Forssk.) I.Darbysh.	Acanthaceae	8	1	0.03	0.234
Dioscorea praehensilis Benth.	Dioscoreaceae	8	1	0.03	0.234
Glinus lotoides L.	Molluginaceae	8	1	0.03	0.234
Indigofera suffruticosa Mill.	Fabaceae	8	1	0.03	0.234
Lannea egregia Engl. & K.Krause	Anacardiaceae	8	1	0.03	0.234
Mucuna pruriens (L.) DC.	Fabaceae	8	1	0.03	0.234
Paspalum scrobiculatum L.	Poaceae	8	1	0.03	0.234
Phyllanthus reticulatus Poir.	Phyllanthaceae	8	1	0.03	0.234
Solenostemon rotundifolius (Poir.) J.K.Morton	Lamiaceae	8	1	0.03	0.234
Afraegle paniculata (Schumach.) Engl.	Rutaceae	7	2	0.05	0.232
Chrysopogon nigritanus (Benth.) Veldkamp	Poaceae	7	2	0.05	0.232
Cissus quadrangularis L.	Vitaceae	7	2	0.05	0.232
Crotalaria retusa L.	Fabaceae	7	2	0.05	0.232
Cyperus rotundus L.	Cyperaceae	7	2	0.05	0.232
Elaeis guineensis Jacq.	Arecaceae	7	2	0.05	0.232
Evolvulus alsinoides (L.) L.	Convolvulaceae	7	2	0.05	0.232
Gardenia aqualla Stapf & Hutch.	Rubiaceae	7	2	0.05	0.232
Periploca nigrescens Afzel.	Apocynaceae	7	2	0.05	0.232
Portulaca quadrifida L.	Portulacaceae	7	2	0.05	0.232
Sesbania pachycarpa DC.	Fabaceae	7	2	0.05	0.232
Terminalia schimperiana Hochst.	Combretaceae	7	2	0.05	0.232
Allium sativum L.	Alliaceae	6	3	0.08	0.229
Cassia singueana Delile	Fabaceae	6	3	0.08	0.229
Crateva adansonii DC.	Capparaceae	6	3	0.08	0.229
Indigofera macrocalyx Guill. & Perr.	Fabaceae	6	3	0.08	0.229
Syzygium guineense (Willd.) DC.	Myrtaceae	6	3	0.08	0.229
Excoecaria grahamii Stapf	Euphorbiaceae	5	4	0.1	0.227
Strychnos innocua Delile	Loganiaceae	5	4	0.1	0.227
Amaranthus hybridus L.	Amaranthaceae	7	1	0.03	0.208
Annona squamosa L.	Annonaceae	7	1	0.03	0.208
Boerhavia erecta L.	Nyctaginaceae	7	1	0.03	0.208
Citrullus lanatus (Thunb.) Matsum. & Nakai	Cucurbitaceae	7	1	0.03	0.208
Cleome gynandra L.	Capparaceae	7	1	0.03	0.208
Commelina forskaolii Vahl	Commelinaceae	7	1	0.03	0.208
Cyathula achyranthoides (Kunth) Moq.	Amaranthaceae	7	1	0.03	0.208
Datura inoxia Mill.	Solanaceae	7	1	0.03	0.208
Desmodium hirtum Guill. & Perr.	Fabaceae	7	1	0.03	0.208
Detarium senegalense J.F.Gmel.	Fabaceae	7	1	0.03	0.208
Digitaria exilis (Kippist) Stapf	Poaceae	7	1	0.03	0.208
Ficus natalensis Hochst.	Moraceae	7	1	0.03	0.208
Gomphrena globosa L.	Amaranthaceae	7	1	0.03	0.208
Grewia lasiodiscus K.Schum.	Malvaceae	7	1	0.03	0.208
Ipomoea mauritiana Jacq.	Convolvulaceae	7	1	0.03	0.208
Lonchocarpus sericeus (Poir.) Kunth	Fabaceae	7	1	0.03	0.208
Macrosphyra longistyla (DC.) Hiern	Rubiaceae	7	1	0.03	0.208
Mikania chevalieri (C.D.Adams) W.C.Holmes & McDaniel	Asteraceae	7	1	0.03	0.208
Rhus crenulata A.Rich.	Anacardiaceae	7	1	0.03	0.208
Spermacoce verticillata L.	Rubiaceae	7	1	0.03	0.208
Talinum triangulare (Jacq.) Willd.	Talinaceae	7	1	0.03	0.208
Thonningia sanguinea Vahl	Balanophoraceae	7	1	0.03	0.208
Andira inermis (W.Wright) DC.	Fabaceae	6	2	0.05	0.206
Andropogon canaliculatus Schumach.	Poaceae	6	2	0.05	0.206
Bobgunnia madagascariensis (Desv.) J.H.Kirkbr. & Wiersema	Fabaceae	6	2	0.05	0.206
Cassia italica (Mill.) Lam. ex F.W.Andrews	Fabaceae	6	2	0.05	0.206
Cissus aralioides (Baker) Planch.	Vitaceae	6	2	0.05	0.206
Citrus limon (L.) Burm.f.	Rutaceae	6	2	0.05	0.206
Combretum sericeum G.Don	Combretaceae	6	2	0.05	0.206
Eriosema glomeratum (Guill. & Perr.) Hook.f.	Fabaceae	6	2	0.05	0.206
Flacourtia indica (Burm.f.) Merr.	Salicaceae	6	2	0.05	0.206
Hyptis suaveolens Poit.	Lamiaceae	6	2	0.05	0.206
Ipomoea eriocarpa R.Br.	Convolvulaceae	6	2	0.05	0.206
Linzia nigritiana (Oliv. & Hiern) Isawumi	Asteraceae	6	2	0.05	0.206
Olax subscorpioidea Oliv.	Olacaceae	6	2	0.05	0.206
Saccharum officinarum L.	Poaceae	6	2	0.05	0.206
Carapa procera DC.	Meliaceae	5	3	0.08	0.203
Hyphaene thebaica (L.) Mart.	Arecaceae	5	3	0.08	0.203
Oncoba spinosa Forssk.	Salicaceae	5	3	0.08	0.203
Tapinanthus bangwensis (Engl. & K.Krause) Danser	Loranthaceae	5	3	0.08	0.203
Tectona grandis L.f.	Lamiaceae	5	3	0.08	0.203
Euphorbia convolvuloides Hochst. ex Benth.	Euphorbiaceae	4	4	0.1	0.201
Abelmoschus moschatus Medik.	Malvaceae	6	1	0.03	0.182
Acacia gerrardii Benth.	Fabaceae	6	1	0.03	0.182
Aloe buettneri A.Berger	Xanthorrhoeaceae	6	1	0.03	0.182
Alstonia congensis Engl.	Apocynaceae	6	1	0.03	0.182
Anchomanes difformis (Blume) Engl.	Araceae	6	1	0.03	0.182
Antidesma venosum E.Mey. ex Tul.	Euphorbiaceae	6	1	0.03	0.182
Cascabela thevetia (L.) Lippold	Apocynaceae	6	1	0.03	0.182
Citrullus colocynthis (L.) Schrad.	Cucurbitaceae	6	1	0.03	0.182
Coldenia procumbens L.	Boraginaceae	6	1	0.03	0.182
Commelina erecta L.	Commelinaceae	6	1	0.03	0.182
Dactyloctenium aegyptium (L.) Willd.	Poaceae	6	1	0.03	0.182
Euphorbia prostrata Aiton	Euphorbiaceae	6	1	0.03	0.182
Ficus dicranostyla Mildbr.	Moraceae	6	1	0.03	0.182
Ficus vogeliana (Miq.) Miq.	Moraceae	6	1	0.03	0.182
Flemingia faginea (Guill. & Perr.) Baker	Fabaceae	6	1	0.03	0.182
Gomphrena celosioides Mart.	Amaranthaceae	6	1	0.03	0.182
Ipomoea aquatica Forssk.	Convolvulaceae	6	1	0.03	0.182
Mallotus oppositifolius (Geiseler) Müll.Arg.	Euphorbiaceae	6	1	0.03	0.182
Merremia tridentata (L.) Hallier f.	Convolvulaceae	6	1	0.03	0.182
Momordica charantia L.	Cucurbitaceae	6	1	0.03	0.182
Parkinsonia aculeata L.	Fabaceae	6	1	0.03	0.182
Pavetta oblongifolia (Hiern) Bremek.	Rubiaceae	6	1	0.03	0.182
Pennisetum pedicellatum Trin.	Poaceae	6	1	0.03	0.182
Phoenix dactylifera L.	Arecaceae	6	1	0.03	0.182
Plumbago zeylanica L.	Plumbaginaceae	6	1	0.03	0.182
Pulicaria undulata (L.) C.A.Mey.	Asteraceae	6	1	0.03	0.182
Sesbania rostrata Bremek. & Oberm.	Fabaceae	6	1	0.03	0.182
Uraria picta (Jacq.) DC.	Fabaceae	6	1	0.03	0.182
Astraea lobata (L.) Klotzsch	Euphorbiaceae	5	2	0.05	0.179
Biophytum umbraculum Welw.	Oxalidaceae	5	2	0.05	0.179
Breonadia salicina (Vahl) Hepper & J.R.I.Wood	Rubiaceae	5	2	0.05	0.179
Cyperus esculentus L.	Cyperaceae	5	2	0.05	0.179
Dioscorea bulbifera L.	Dioscoreaceae	5	2	0.05	0.179
Erythrophleum suaveolens (Guill. & Perr.) Brenan	Fabaceae	5	2	0.05	0.179
Manilkara multinervis (Baker) Dubard	Sapotaceae	5	2	0.05	0.179
Oryza sativa L.	Poaceae	5	2	0.05	0.179
Pergularia daemia (Forssk.) Chiov.	Apocynaceae	5	2	0.05	0.179
Philenoptera cyanescens (Schumach. & Thonn.) Roberty	Fabaceae	5	2	0.05	0.179
Quassia undulata (Guill. & Perr.) F.Dietr.	Simaroubaceae	5	2	0.05	0.179
Rourea coccinea (Thonn. ex Schumach.) Benth.	Connaraceae	5	2	0.05	0.179
Saba comorensis (Bojer ex A.DC.) Pichon	Apocynaceae	5	2	0.05	0.179
Sansevieria liberica Gérôme & Labroy	Asparagaceae	5	2	0.05	0.179
Sesbania bispinosa (Jacq.) W.Wight	Fabaceae	5	2	0.05	0.179
Stylochaeton hypogaeus Lepr.	Araceae	5	2	0.05	0.179
Acacia hockii De Wild.	Fabaceae	4	3	0.08	0.177
Andropogon gayanus Kunth	Poaceae	4	3	0.08	0.177
Grewia cissoides Hutch. & Dalziel	Malvaceae	4	3	0.08	0.177
Landolphia heudelotii A.DC.	Apocynaceae	4	3	0.08	0.177
Uapaca togoensis Pax	Phyllanthaceae	4	3	0.08	0.177
Albizia zygia (DC.) J.F.Macbr.	Fabaceae	5	1	0.03	0.155
Amaranthus graecizans L.	Amaranthaceae	5	1	0.03	0.155
Ceropegia sankuruensis Schltr.	Apocynaceae	5	1	0.03	0.155
Cordyla pinnata (Lepr. ex A.Rich.) Milne-Redh.	Fabaceae	5	1	0.03	0.155
Crescentia cujete L.	Bignoniaceae	5	1	0.03	0.155
Crotalaria barkae Schweinf.	Fabaceae	5	1	0.03	0.155
Cryptolepis sanguinolenta (Lindl.) Schltr.	Apocynaceae	5	1	0.03	0.155
Cynodon dactylon (L.) Pers.	Poaceae	5	1	0.03	0.155
Fadogia erythrophloea (K.Schum. & K.Krause) Hutch. & Dalziel	Rubiaceae	5	1	0.03	0.155
Ficus umbellata Vahl	Moraceae	5	1	0.03	0.155
Ficus vallis-choudae Delile	Moraceae	5	1	0.03	0.155
Grangea maderaspatana (L.) Desf.	Asteraceae	5	1	0.03	0.155
Heliotropium crispum Desf.	Boraginaceae	5	1	0.03	0.155
Ipomoea involucrata P.Beauv.	Convolvulaceae	5	1	0.03	0.155
Kyllinga odorata Vahl	Cyperaceae	5	1	0.03	0.155
Laportea aestuans (L.) Chew	Urticaceae	5	1	0.03	0.155
Manilkara obovata (Sabine & G.Don) J.H.Hemsl.	Sapotaceae	5	1	0.03	0.155
Nicotiana rustica L.	Solanaceae	5	1	0.03	0.155
Ocimum gratissimum L.	Lamiaceae	5	1	0.03	0.155
Pseudarthria fagifolia Baker	Fabaceae	5	1	0.03	0.155
Sorindeia juglandifolia (A.Rich.) Planch. ex Oliv.	Anacardiaceae	5	1	0.03	0.155
Sporobolus pyramidalis P.Beauv.	Poaceae	5	1	0.03	0.155
Acacia ehrenbergiana Hayne	Fabaceae	4	2	0.05	0.153
Anthostema senegalense A.Juss.	Euphorbiaceae	4	2	0.05	0.153
Antiaris toxicaria Lesch.	Moraceae	4	2	0.05	0.153
Berlinia grandiflora (Vahl) Hutch. & Dalziel	Fabaceae	4	2	0.05	0.153
Bridelia scleroneura Müll.Arg.	Phyllanthaceae	4	2	0.05	0.153
Erythrophleum africanum (Welw. ex Benth.) Harms	Fabaceae	4	2	0.05	0.153
Gmelina arborea Roxb.	Lamiaceae	4	2	0.05	0.153
Grewia carpinifolia Juss.	Malvaceae	4	2	0.05	0.153
Indigofera leptoclada Harms	Fabaceae	4	2	0.05	0.153
Leptadenia pyrotechnica (Forssk.) Decne.	Apocynaceae	4	2	0.05	0.153
Pandiaka angustifolia (Vahl) Hepper	Amaranthaceae	4	2	0.05	0.153
Sesamum alatum Thonn.	Pedaliaceae	4	2	0.05	0.153
Sphaeranthus senegalensis DC.	Asteraceae	4	2	0.05	0.153
Tridax procumbens L.	Asteraceae	4	2	0.05	0.153
Ziziphus abyssinica A.Rich.	Rhamnaceae	4	2	0.05	0.153
Cayratia gracilis (Guill. & Perr.) Suess.	Vitaceae	3	3	0.08	0.15
Cussonia arborea Hochst. ex A.Rich.	Araliaceae	3	3	0.08	0.15
Cochlospermum planchonii Hook.f.	Bixaceae	2	4	0.1	0.148
Abrus melanospermus Hassk.	Fabaceae	4	1	0.03	0.129
Alysicarpus ovalifolius (Schumach.) J.Léonard	Fabaceae	4	1	0.03	0.129
Ampelocissus multistriata (Baker) Planch.	Vitaceae	4	1	0.03	0.129
Asparagus africanus Lam.	Asparagaceae	4	1	0.03	0.129
Bacopa hamiltoniana (Benth.) Wettst.	Plantaginaceae	4	1	0.03	0.129
Bidens engleri O.E.Schulz	Asteraceae	4	1	0.03	0.129
Bidens pilosa L.	Asteraceae	4	1	0.03	0.129
Cienfuegosia digitata Cav.	Malvaceae	4	1	0.03	0.129
Citrus reticulata Blanco	Rutaceae	4	1	0.03	0.129
Crinum distichum Herb.	Amaryllidaceae	4	1	0.03	0.129
Cucumis metuliferus E.Mey. ex Naudin	Cucurbitaceae	4	1	0.03	0.129
Ekebergia capensis Sparrm.	Meliaceae	4	1	0.03	0.129
Eriosema psoraloides (Lam.) G.Don	Fabaceae	4	1	0.03	0.129
Euphorbia thymifolia L.	Euphorbiaceae	4	1	0.03	0.129
Ficus ovata Vahl	Moraceae	4	1	0.03	0.129
Gliricidia sepium (Jacq.) Walp.	Fabaceae	4	1	0.03	0.129
Gymnema sylvestre (Retz.) Schult.	Apocynaceae	4	1	0.03	0.129
Imperata cylindrica (L.) Raeusch.	Poaceae	4	1	0.03	0.129
Keetia venosa (Oliv.) Bridson	Rubiaceae	4	1	0.03	0.129
Landolphia dulcis (Sabine) Pichon	Apocynaceae	4	1	0.03	0.129
Momordica balsamina L.	Cucurbitaceae	4	1	0.03	0.129
Pandiaka involucrata (Moq.) B.D.Jacks.	Amaranthaceae	4	1	0.03	0.129
Panicum subalbidum Kunth	Poaceae	4	1	0.03	0.129
Pavetta corymbosa (DC.) F.N.Williams	Rubiaceae	4	1	0.03	0.129
Pennisetum polystachion (L.) Schult.	Poaceae	4	1	0.03	0.129
Peperomia pellucida H.B. & K.	Piperaceae	4	1	0.03	0.129
Phoenix reclinata Jacq.	Arecaceae	4	1	0.03	0.129
Portulaca grandiflora Hook.	Portulacaceae	4	1	0.03	0.129
Sarcostemma viminale (L.) R.Br.	Apocynaceae	4	1	0.03	0.129
Sida alba L.	Malvaceae	4	1	0.03	0.129
Sida rhombifolia L.	Malvaceae	4	1	0.03	0.129
Spermacoce chaetocephala DC.	Rubiaceae	4	1	0.03	0.129
Steganotaenia araliacea Hochst.	Apiaceae	4	1	0.03	0.129
Struchium sparganophorum (L.) Kuntze	Asteraceae	4	1	0.03	0.129
Stylosanthes fruticosa (Retz.) Alston	Fabaceae	4	1	0.03	0.129
Synedrella nodiflora Gaertn.	Asteraceae	4	1	0.03	0.129
Bergia suffruticosa (Delile) Fenzl	Elatinaceae	3	2	0.05	0.127
Calyptrochilum christyanum (Rchb.f.) Summerh.	Orchidaceae	3	2	0.05	0.127
Cordia sinensis Lam.	Boraginaceae	3	2	0.05	0.127
Dyschoriste nagchana (Nees) Bennet	Acanthaceae	3	2	0.05	0.127
Euphorbia sudanica A.Chev.	Euphorbiaceae	3	2	0.05	0.127
Ficus abutilifolia (Miq.) Miq.	Moraceae	3	2	0.05	0.127
Indigofera bracteolata DC.	Fabaceae	3	2	0.05	0.127
Mollugo nudicaulis Lam.	Molluginaceae	3	2	0.05	0.127
Pentadesma butyracea Sabine	Clusiaceae	3	2	0.05	0.127
Pterocarpus santalinoides DC.	Fabaceae	3	2	0.05	0.127
Sporobolus festivus Hochst. ex A.Rich.	Poaceae	3	2	0.05	0.127
Tapinanthus globiferus (A.Rich.) Tiegh.	Loranthaceae	3	2	0.05	0.127
Terminalia mollis M.A.Lawson	Combretaceae	3	2	0.05	0.127
Tetracera alnifolia Willd.	Dilleniaceae	3	2	0.05	0.127
Trema orientalis (L.) Blume	Cannabaceae	3	2	0.05	0.127
Pterocarpus lucens Lepr. ex Guill. & Perr.	Fabaceae	2	3	0.08	0.124
Abutilon pannosum (G.Forst.) Schltdl.	Malvaceae	3	1	0.03	0.103
Acacia amythethophylla Steud. ex A.Rich.	Fabaceae	3	1	0.03	0.103
Aerva javanica (Burm.f.) Juss. ex Schult.	Amaranthaceae	3	1	0.03	0.103
Alternanthera nodiflora R.Br.	Amaranthaceae	3	1	0.03	0.103
Amaranthus dubius Mart. ex Thell.	Amaranthaceae	3	1	0.03	0.103
Amorphophallus dracontioides (Engl.) N.E.Br.	Araceae	3	1	0.03	0.103
Amorphophallus johnsonii N.E.Br.	Araceae	3	1	0.03	0.103
Aneilema paludosum A.Chev.	Commelinaceae	3	1	0.03	0.103
Apodostigma pallens (Planch. ex Oliv.) R.Wilczek	Celastraceae	3	1	0.03	0.103
Aspilia kotschyi (Sch.Bip.) Oliv.	Asteraceae	3	1	0.03	0.103
Celosia argentea L.	Amaranthaceae	3	1	0.03	0.103
Chrozophora senegalensis (Lam.) A.Juss. ex Spreng.	Euphorbiaceae	3	1	0.03	0.103
Clitoria ternatea L.	Fabaceae	3	1	0.03	0.103
Commelina benghalensis L.	Commelinaceae	3	1	0.03	0.103
Cremaspora triflora (Thonn.) K.Schum.	Rubiaceae	3	1	0.03	0.103
Cyperus articulatus L.	Cyperaceae	3	1	0.03	0.103
Cyphostemma flavicans (Baker) Desc.	Vitaceae	3	1	0.03	0.103
Eragrostis tremula Hochst. ex Steud.	Poaceae	3	1	0.03	0.103
Gnidia kraussiana Meisn.	Thymelaeaceae	3	1	0.03	0.103
Gongronema latifolium Benth.	Apocynaceae	3	1	0.03	0.103
Hibiscus rostellatus Guill. & Perr.	Malvaceae	3	1	0.03	0.103
Hybanthus enneaspermus (L.) F.Muell.	Violaceae	3	1	0.03	0.103
Indigofera congesta Welw. ex Baker	Fabaceae	3	1	0.03	0.103
Indigofera hirsuta L.	Fabaceae	3	1	0.03	0.103
Isoberlinia tomentosa (Harms) Craib & Stapf	Fabaceae	3	1	0.03	0.103
Lactuca inermis Forssk.	Asteraceae	3	1	0.03	0.103
Lannea fruticosa (Hochst. ex A.Rich.) Engl.	Anacardiaceae	3	1	0.03	0.103
Lantana ukambensis (Vatke) Verdc.	Verbenaceae	3	1	0.03	0.103
Lepidagathis heudelotiana Nees	Acanthaceae	3	1	0.03	0.103
Leucaena leucocephala (Lam.) de Wit	Fabaceae	3	1	0.03	0.103
Lippia multiflora Moldenke	Verbenaceae	3	1	0.03	0.103
Manihot esculenta Crantz	Euphorbiaceae	3	1	0.03	0.103
Melanthera gambica Hutch. & Dalziel	Asteraceae	3	1	0.03	0.103
Melinis repens (Willd.) Zizka	Poaceae	3	1	0.03	0.103
Ochna rhizomatosa (Tiegh.) Keay	Ochnaceae	3	1	0.03	0.103
Polycarpaea linearifolia (DC.) DC.	Caryophyllaceae	3	1	0.03	0.103
Psophocarpus palustris Desv.	Fabaceae	3	1	0.03	0.103
Ritchiea capparoides (Andrews) Britten	Capparaceae	3	1	0.03	0.103
Rottboellia cochinchinensis (Lour.) Clayton	Poaceae	3	1	0.03	0.103
Salvadora persica L.	Salvadoraceae	3	1	0.03	0.103
Schoenefeldia gracilis Kunth	Poaceae	3	1	0.03	0.103
Sesamum radiatum Schumach. & Thonn.	Pedaliaceae	3	1	0.03	0.103
Sorghum arundinaceum (Desv.) Stapf	Poaceae	3	1	0.03	0.103
Strophanthus hispidus DC.	Apocynaceae	3	1	0.03	0.103
Triumfetta rhomboidea Jacq.	Malvaceae	3	1	0.03	0.103
Acacia laeta R.Br. ex Benth.	Fabaceae	2	2	0.05	0.1
Allium cepa L.	Alliaceae	2	2	0.05	0.1
Allophylus spicatus (Poir.) Radlk.	Sapindaceae	2	2	0.05	0.1
Ambrosia maritima L.	Asteraceae	2	2	0.05	0.1
Borassus akeassii Bayton. Ouédr. & Guinko	Arecaceae	2	2	0.05	0.1
Canavalia ensiformis (L.) DC.	Fabaceae	2	2	0.05	0.1
Cassia podocarpa Guill. & Perr.	Fabaceae	2	2	0.05	0.1
Croton pseudopulchellus Pax	Euphorbiaceae	2	2	0.05	0.1
Curculigo pilosa (Schumach. & Thonn.) Engl.	Hypoxidaceae	2	2	0.05	0.1
Ficus trichopoda Baker	Moraceae	2	2	0.05	0.1
Martynia annua L.	Martyniaceae	2	2	0.05	0.1
Monechma ciliatum (Jacq.) Milne-Redh.	Acanthaceae	2	2	0.05	0.1
Monotes kerstingii Gilg	Dipterocarpaceae	2	2	0.05	0.1
Pachycarpus lineolatus (Decne.) Bullock	Apocynaceae	2	2	0.05	0.1
Persea americana Mill.	Lauraceae	2	2	0.05	0.1
Phaulopsis imbricata (Forssk.) Sweet	Acanthaceae	2	2	0.05	0.1
Raphia sudanica A.Chev.	Arecaceae	2	2	0.05	0.1
Rhynchosia pycnostachya (DC.) Meikle	Fabaceae	2	2	0.05	0.1
Stachytarpheta indica (L.) Vahl	Verbenaceae	2	2	0.05	0.1
Vernonia pumila Kotschy & Peyr.	Asteraceae	2	2	0.05	0.1
Abutilon grandifolium (Willd.) Sweet	Malvaceae	2	1	0.03	0.076
Agave sisalana Perrine	Agavaceae	2	1	0.03	0.076
Alternanthera sessilis (L.) DC.	Amaranthaceae	2	1	0.03	0.076
Ancylobotrys amoena Hua	Apocynaceae	2	1	0.03	0.076
Aristida sieberiana Trin.	Poaceae	2	1	0.03	0.076
Aristolochia albida Duch.	Aristolochiaceae	2	1	0.03	0.076
Aspilia helianthoides (Schumach. & Thonn.) Oliv. & Hiern	Asteraceae	2	1	0.03	0.076
Aspilia rudis Oliv. & Hiern	Asteraceae	2	1	0.03	0.076
Bulbostylis boeckeleriana (Schweinf.) Beetle	Cyperaceae	2	1	0.03	0.076
Calamus deerratus G.Mann & H.Wendl.	Arecaceae	2	1	0.03	0.076
Centaurea praecox Oliv. & Hiern	Asteraceae	2	1	0.03	0.076
Centaurea senegalensis DC.	Asteraceae	2	1	0.03	0.076
Centella asiatica (L.) Urb.	Apiaceae	2	1	0.03	0.076
Chasmanthera dependens Hochst.	Menispermaceae	2	1	0.03	0.076
Cleistopholis patens (Benth.) Engl. & Diels	Annonaceae	2	1	0.03	0.076
Combretum nioroense Aubrév. ex Keay	Combretaceae	2	1	0.03	0.076
Crotalaria glauca Willd.	Fabaceae	2	1	0.03	0.076
Crotalaria goreensis Guill. & Perr.	Fabaceae	2	1	0.03	0.076
Crotalaria podocarpa DC.	Fabaceae	2	1	0.03	0.076
Dalbergia sissoo Roxb. ex. DC.	Fabaceae	2	1	0.03	0.076
Desmodium salicifolium (Poir.) DC.	Fabaceae	2	1	0.03	0.076
Digitaria horizontalis Willd.	Poaceae	2	1	0.03	0.076
Dombeya quinqueseta (Delile) Exell	Malvaceae	2	1	0.03	0.076
Echinochloa colona (L.) Link	Poaceae	2	1	0.03	0.076
Elionurus elegans Kunth	Poaceae	2	1	0.03	0.076
Eragrostis ciliaris (L.) R.Br.	Poaceae	2	1	0.03	0.076
Ficus cordata Thunb.	Moraceae	2	1	0.03	0.076
Glossonema boveanum (Decne.) Decne.	Apocynaceae	2	1	0.03	0.076
Guibourtia copallifera Benn.	Fabaceae	2	1	0.03	0.076
Haematostaphis barteri Hook.f.	Anacardiaceae	2	1	0.03	0.076
Heliotropium bacciferum Forssk.	Boraginaceae	2	1	0.03	0.076
Heliotropium zeylanicum (Burm.f.) Lam.	Boraginaceae	2	1	0.03	0.076
Heteropogon contortus (L.) Roem. & Schult.	Poaceae	2	1	0.03	0.076
Hibiscus scotellii Baker f.	Malvaceae	2	1	0.03	0.076
Hyptis lanceolata Poir.	Lamiaceae	2	1	0.03	0.076
Indigofera diphylla Vent.	Fabaceae	2	1	0.03	0.076
Indigofera paniculata Vahl ex Pers.	Fabaceae	2	1	0.03	0.076
Indigofera simplicifolia Lam.	Fabaceae	2	1	0.03	0.076
Jasminum dichotomum Vahl	Oleaceae	2	1	0.03	0.076
Kyllinga pumila Michx.	Cyperaceae	2	1	0.03	0.076
Macledium sessiliflorum (Harv.) S.Ortiz	Asteraceae	2	1	0.03	0.076
Markhamia tomentosa (Benth.) K.Schum. ex Engl.	Bignoniaceae	2	1	0.03	0.076
Melanthera rhombifolia O.Hoffm. & Muschl.	Asteraceae	2	1	0.03	0.076
Melastomastrum capitatum (Vahl) A.Fern. & R.Fern.	Melastomataceae	2	1	0.03	0.076
Oldenlandia affinis (Roem. & Schult.) DC.	Rubiaceae	2	1	0.03	0.076
Panicum fluviicola Steud.	Poaceae	2	1	0.03	0.076
Phyllanthus pentandrus Schumach. & Thonn.	Phyllanthaceae	2	1	0.03	0.076
Polycarpon prostratum (Forssk.) Asch. & Schweinf.	Caryophyllaceae	2	1	0.03	0.076
Pseudoconyza viscosa (Mill.) D'Arcy	Asteraceae	2	1	0.03	0.076
Psorospermum febrifugum Spach	Hypericaceae	2	1	0.03	0.076
Psychotria vogeliana Benth.	Rubiaceae	2	1	0.03	0.076
Rhynchosia buettneri Harms	Fabaceae	2	1	0.03	0.076
Rhynchospora corymbosa (L.) Britton	Cyperaceae	2	1	0.03	0.076
Scleria racemosa Poir.	Cyperaceae	2	1	0.03	0.076
Sesbania sesban (L.) Merr.	Fabaceae	2	1	0.03	0.076
Setaria pumila (Poir.) Roem. & Schult.	Poaceae	2	1	0.03	0.076
Spermacoce radiata (DC.) Hiern	Rubiaceae	2	1	0.03	0.076
Spermacoce ruelliae DC.	Rubiaceae	2	1	0.03	0.076
Synsepalum brevipes (Baker) T.D.Penn.	Sapotaceae	2	1	0.03	0.076
Tacazzea apiculata Oliv.	Apocynaceae	2	1	0.03	0.076
Terminalia albida Scott-Elliot	Combretaceae	2	1	0.03	0.076
Tetracera potatoria Afzel. ex G.Don	Dilleniaceae	2	1	0.03	0.076
Thalia geniculata L.	Marantaceae	2	1	0.03	0.076
Tinospora bakis (A.Rich.) Miers	Menispermaceae	2	1	0.03	0.076
Zornia glochidiata Rchb. ex DC.	Fabaceae	2	1	0.03	0.076
Anthocleista djalonensis A.Chev.	Gentianaceae	1	2	0.05	0.074
Blainvillea gayana Cass.	Asteraceae	1	2	0.05	0.074
Celtis toka (Forssk.) Hepper & J.R.I.Wood	Cannabaceae	1	2	0.05	0.074
Combretum racemosum P.Beauv.	Combretaceae	1	2	0.05	0.074
Costus spectabilis (Fenzl) K.Schum.	Costaceae	1	2	0.05	0.074
Indigofera dendroides Jacq.	Fabaceae	1	2	0.05	0.074
Indigofera stenophylla Guill. & Perr.	Fabaceae	1	2	0.05	0.074
Melia azedarach L.	Meliaceae	1	2	0.05	0.074
Psychotria psychotrioides (DC.) Roberty	Rubiaceae	1	2	0.05	0.074
Rourea minor (Gaertn.) Alston	Connaraceae	1	2	0.05	0.074
Vitex chrysocarpa Planch. ex Benth.	Lamiaceae	1	2	0.05	0.074
Xysmalobium heudelotianum Decne.	Apocynaceae	1	2	0.05	0.074
Abrus canescens Welw. ex Baker	Fabaceae	1	1	0.03	0.05
Acalypha ciliata Forssk.	Euphorbiaceae	1	1	0.03	0.05
Acmella uliginosa (Sw.) Cass.	Asteraceae	1	1	0.03	0.05
Acridocarpus chevalieri Sprague	Malpighiaceae	1	1	0.03	0.05
Aerva lanata (L.) Juss. ex Schult.	Amaranthaceae	1	1	0.03	0.05
Aeschynomene afraspera J.Léonard	Fabaceae	1	1	0.03	0.05
Aeschynomene sensitiva Sw.	Fabaceae	1	1	0.03	0.05
Albizia lebbeck (L.) Benth.	Fabaceae	1	1	0.03	0.05
Ampelocissus leonensis (Hook.f.) Planch.	Vitaceae	1	1	0.03	0.05
Ananas comosus (L.) Merr.	Bromeliaceae	1	1	0.03	0.05
Andropogon africanus Franch.	Poaceae	1	1	0.03	0.05
Andropogon chinensis (Nees) Merr.	Poaceae	1	1	0.03	0.05
Annona glauca Schumach. & Thonn.	Annonaceae	1	1	0.03	0.05
Antherotoma irvingiana (Hook.f.) Jacq.-Fél.	Melastomataceae	1	1	0.03	0.05
Anthocleista procera Lepr. ex A.Chev.	Gentianaceae	1	1	0.03	0.05
Bambusa vulgaris Schrad. ex J.C.Wendl.	Poaceae	1	1	0.03	0.05
Basilicum polystachyon (L.) Moench	Lamiaceae	1	1	0.03	0.05
Boerhavia coccinea Mill.	Nyctaginaceae	1	1	0.03	0.05
Bulbostylis hispidula (Vahl) R.W.Haines	Cyperaceae	1	1	0.03	0.05
Cadaba glandulosa Forssk.	Capparaceae	1	1	0.03	0.05
Canscora decussata (Roxb.) Roem. & Schult.	Gentianaceae	1	1	0.03	0.05
Casuarina equisetifolia L.	Casuarinaceae	1	1	0.03	0.05
Ceropegia rhynchantha Schltr.	Apocynaceae	1	1	0.03	0.05
Chloris virgata Sw.	Poaceae	1	1	0.03	0.05
Chlorophytum blepharophyllum Schweinf. ex Baker	Asparagaceae	1	1	0.03	0.05
Chrozophora brocchiana (Vis.) Schweinf.	Euphorbiaceae	1	1	0.03	0.05
Cissampelos mucronata A.Rich.	Menispermaceae	1	1	0.03	0.05
Cissus cornifolia (Baker) Planch.	Vitaceae	1	1	0.03	0.05
Cissus diffusiflora (Baker) Planch.	Vitaceae	1	1	0.03	0.05
Clerodendrum capitatum (Willd.) Schumach.	Lamiaceae	1	1	0.03	0.05
Cola gigantea A.Chev.	Malvaceae	1	1	0.03	0.05
Combretum lecardii Engl. & Diels	Combretaceae	1	1	0.03	0.05
Crotalaria macrocalyx Benth.	Fabaceae	1	1	0.03	0.05
Crotalaria pallida Aiton	Fabaceae	1	1	0.03	0.05
Croton gratissimus Burch.	Euphorbiaceae	1	1	0.03	0.05
Cryptolepis oblongifolia (Meisn.) Schltr.	Apocynaceae	1	1	0.03	0.05
Ctenium elegans Kunth	Poaceae	1	1	0.03	0.05
Cucumis maderaspatanus L.	Cucurbitaceae	1	1	0.03	0.05
Cucumis prophetarum L.	Cucurbitaceae	1	1	0.03	0.05
Cyanotis lanata Benth.	Commelinaceae	1	1	0.03	0.05
Cyphostemma adenocaule (Steud. ex A.Rich.) Desc. ex Wild & R.B.Drumm.	Vitaceae	1	1	0.03	0.05
Cyphostemma waterlotii (A.Chev.) Desc.	Vitaceae	1	1	0.03	0.05
Digitaria leptorhachis (Pilg.) Stapf	Poaceae	1	1	0.03	0.05
Dioscorea dumetorum (Kunth) Pax	Dioscoreaceae	1	1	0.03	0.05
Diospyros elliotii (Hiern) F.White	Ebenaceae	1	1	0.03	0.05
Dissotis thollonii Cogn. ex Büttner	Melastomataceae	1	1	0.03	0.05
Dodonaea viscosa Jacq.	Sapindaceae	1	1	0.03	0.05
Drosera indica L.	Droseraceae	1	1	0.03	0.05
Echinochloa pyramidalis (Lam.) Hitchc. & Chase	Poaceae	1	1	0.03	0.05
Echinops longifolius A.Rich.	Asteraceae	1	1	0.03	0.05
Elionurus ciliaris Kunth	Poaceae	1	1	0.03	0.05
Embelia guineensis Baker	Primulaceae	1	1	0.03	0.05
Englerina lecardii (Engl.) Balle	Loranthaceae	1	1	0.03	0.05
Eragrostis gangetica (Roxb.) Steud.	Poaceae	1	1	0.03	0.05
Eriosema griseum Baker	Fabaceae	1	1	0.03	0.05
Euphorbia forskalii J.Gay	Euphorbiaceae	1	1	0.03	0.05
Euphorbia heterophylla L.	Euphorbiaceae	1	1	0.03	0.05
Euphorbia hyssopifolia L.	Euphorbiaceae	1	1	0.03	0.05
Euphorbia paganorum A.Chev.	Euphorbiaceae	1	1	0.03	0.05
Euphorbia polycnemoides Hochst. ex Boiss.	Euphorbiaceae	1	1	0.03	0.05
Euphorbia unispina N.E.Br.	Euphorbiaceae	1	1	0.03	0.05
Euploca ovalifolia (Forssk.) Diane & Hilger	Boraginaceae	1	1	0.03	0.05
Euploca strigosa (Willd.) Diane & Hilger	Boraginaceae	1	1	0.03	0.05
Ficus capreifolia Delile	Moraceae	1	1	0.03	0.05
Ficus polita Vahl	Moraceae	1	1	0.03	0.05
Flabellaria paniculata Cav.	Malpighiaceae	1	1	0.03	0.05
Fuirena umbellata Rottb.	Cyperaceae	1	1	0.03	0.05
Gardenia imperialis K.Schum.	Rubiaceae	1	1	0.03	0.05
Gladiolus gregarius Welw. ex Baker	Iridaceae	1	1	0.03	0.05
Gloriosa superba L.	Colchicaceae	1	1	0.03	0.05
Grewia tenax (Forssk.) Fiori	Malvaceae	1	1	0.03	0.05
Grewia villosa Willd.	Malvaceae	1	1	0.03	0.05
Hygrophila senegalensis (Nees) T.Anderson	Acanthaceae	1	1	0.03	0.05
Hyparrhenia involucrata Stapf	Poaceae	1	1	0.03	0.05
Indigofera capitata Kotschy	Fabaceae	1	1	0.03	0.05
Indigofera colutea (Burm.f.) Merr.	Fabaceae	1	1	0.03	0.05
Indigofera fulvopilosa Brenan	Fabaceae	1	1	0.03	0.05
Indigofera macrophylla Schumach. & Thonn.	Fabaceae	1	1	0.03	0.05
Indigofera pulchra Willd.	Fabaceae	1	1	0.03	0.05
Kohautia grandiflora DC.	Rubiaceae	1	1	0.03	0.05
Lecaniodiscus cupanioides Planch.	Sapindaceae	1	1	0.03	0.05
Lepidium sativum L.	Brassicaceae	1	1	0.03	0.05
Loudetia simplex (Nees) C.E.Hubb.	Poaceae	1	1	0.03	0.05
Lycopersicon esculentum Mill.	Solanaceae	1	1	0.03	0.05
Manihot glaziovii Müll.Arg.	Euphorbiaceae	1	1	0.03	0.05
Melicoccus bijugatus Jacq.	Sapindaceae	1	1	0.03	0.05
Merremia umbellata (L.) Hallier f.	Convolvulaceae	1	1	0.03	0.05
Morelia senegalensis A.Rich.	Rubiaceae	1	1	0.03	0.05
Musa x paradisiaca L.	Musaceae	1	1	0.03	0.05
Neorautanenia mitis (A.Rich.) Verdc.	Fabaceae	1	1	0.03	0.05
Nervilia adolphi Schltr.	Orchidaceae	1	1	0.03	0.05
Nervilia bicarinata (Blume) Schltr.	Orchidaceae	1	1	0.03	0.05
Nymphaea lotus L.	Nymphaeaceae	1	1	0.03	0.05
Osbeckia tubulosa Sm.	Melastomataceae	1	1	0.03	0.05
Pancratium trianthum Herb.	Amaryllidaceae	1	1	0.03	0.05
Panicum afzelii Sw.	Poaceae	1	1	0.03	0.05
Passiflora foetida L.	Passifloraceae	1	1	0.03	0.05
Pennisetum glaucum (L.) R.Br.	Poaceae	1	1	0.03	0.05
Phaulopsis ciliata (Willd.) Hepper	Acanthaceae	1	1	0.03	0.05
Phyllanthus beillei Hutch.	Phyllanthaceae	1	1	0.03	0.05
Phyllanthus maderaspatensis L.	Phyllanthaceae	1	1	0.03	0.05
Polycarpaea corymbosa (L.) Lam.	Caryophyllaceae	1	1	0.03	0.05
Portulaca foliosa Ker Gawl.	Portulacaceae	1	1	0.03	0.05
Pouchetia africana A.Rich. ex DC.	Rubiaceae	1	1	0.03	0.05
Pouteria alnifolia (Baker) Roberty	Sapotaceae	1	1	0.03	0.05
Pseudarthria hookeri Wight & Arn.	Fabaceae	1	1	0.03	0.05
Psorospermum corymbiferum Hochr.	Hypericaceae	1	1	0.03	0.05
Psorospermum senegalense Spach	Hypericaceae	1	1	0.03	0.05
Rhynchosia sublobata (Schumach. & Thonn.) Meikle	Fabaceae	1	1	0.03	0.05
Rotula aquatica Lour.	Boraginaceae	1	1	0.03	0.05
Rutidea parviflora DC.	Rubiaceae	1	1	0.03	0.05
Scadoxus multiflorus (Martyn) Raf.	Amaryllidaceae	1	1	0.03	0.05
Schizachyrium exile (Hochst.) Pilg.	Poaceae	1	1	0.03	0.05
Scleria depressa (C.B.Clarke) Nelmes	Cyperaceae	1	1	0.03	0.05
Sclerocarpus africanus Jacq. ex Murray	Asteraceae	1	1	0.03	0.05
Sebastiania chamaelea (L.) Müll.Arg.	Euphorbiaceae	1	1	0.03	0.05
Secamone afzelii (Schult.) K.Schum.	Apocynaceae	1	1	0.03	0.05
Setaria barbata (Lam.) Kunth	Poaceae	1	1	0.03	0.05
Setaria verticillata (L.) P.Beauv.	Poaceae	1	1	0.03	0.05
Siphonochilus aethiopicus (Schweinf.) B.L.Burtt	Zingiberaceae	1	1	0.03	0.05
Solanum aethiopicum L.	Solanaceae	1	1	0.03	0.05
Spermacoce stachydea DC.	Rubiaceae	1	1	0.03	0.05
Sphenostylis schweinfurthii Harms	Fabaceae	1	1	0.03	0.05
Stenotaphrum secundatum (Walter) Kuntze	Poaceae	1	1	0.03	0.05
Tacca leontopetaloides (L.) Kuntze	Taccaceae	1	1	0.03	0.05
Tephrosia platycarpa Guill. & Perr.	Fabaceae	1	1	0.03	0.05
Terminalia ivorensis A.Chev.	Combretaceae	1	1	0.03	0.05
Thesium viride A.W.Hill	Santalaceae	1	1	0.03	0.05
Tragia vogelii Keay	Euphorbiaceae	1	1	0.03	0.05
Tricalysia okelensis Hiern	Rubiaceae	1	1	0.03	0.05
Triclisia subcordata Oliv.	Menispermaceae	1	1	0.03	0.05
Tylophora oblonga N.E.Br.	Apocynaceae	1	1	0.03	0.05
Tylophora oculata N.E.Br.	Apocynaceae	1	1	0.03	0.05
Usteria guineensis Willd.	Loganiaceae	1	1	0.03	0.05
Vernonia adoensis Sch.Bip. ex Walp.	Asteraceae	1	1	0.03	0.05
Vernonia amygdalina Delile	Asteraceae	1	1	0.03	0.05
Vernonia galamensis (Cass.) Less.	Asteraceae	1	1	0.03	0.05
Vetiveria fulvibarbis (Trin.) Stapf	Poaceae	1	1	0.03	0.05
Wahlenbergia perrottetii (A.DC.) Thulin	Campanulaceae	1	1	0.03	0.05
Xylopia acutiflora (Dunal) A.Rich.	Annonaceae	1	1	0.03	0.05
Zanthoxylum leprieurii Guill. & Perr.	Rutaceae	1	1	0.03	0.05
Ziziphus spina-christi (L.) Desf.	Rhamnaceae	1	1	0.03	0.05
Voacanga thouarsii Roem. & Schult.	Apocynaceae	0	2	0.05	0.048
Orbea decaisneana (Lehm.) Bruyns	Apocynaceae	0	1	0.03	0.024
